# Supplementary material for: A facile copper(i)-catalyzed homocoupling of terminal alkynes to 1,3-diynes with diaziridinone under mild conditions
Source: Royal Society of Chemistry journal article supplement (doi:10.1039/c3ob41621f), 2013-01-01

**A facile copper(I)-catalyzed homocoupling of terminal alkynes to  
1,3-diynes with diaziridinone under mild conditions**

**Yingguang Zhu and Yian Shi\***

*Department of Chemistry  
Colorado State University  
Fort Collins, CO 80523, USA*

E-mail: [yian@lamar.colostate.edu](mailto:yian@lamar.colostate.edu)

**Supporting Information**

**General methods.** All commercially available reagents were used without further purification. Column chromatography was performed on silica gel (200-400 mesh).  $^1\text{H}$  NMR spectra were recorded on a 300 MHz NMR spectrometer and  $^{13}\text{C}$  NMR spectra were recorded on a 75 MHz NMR spectrometer. IR spectra were recorded on a FT-IR spectrometer. Melting points were uncorrected.

**Representative procedure for oxidative homocoupling of terminal alkynes (Table 2, entry 4):** To a 50 mL single-necked flask equipped with a stir bar were added CuBr (0.0717 g, 0.50 mmol) and  $\text{CH}_3\text{CN}$  (15 mL). After the mixture was stirred at rt for 3 min, 1-ethynyl-4-(trifluoromethyl)benzene (**3e**) (1.701 g, 10.0 mmol) was added, followed by the addition of di-*tert*-butyldiaziridinone (**1**) (1.532 g, 9.0 mmol). The reaction mixture was vigorously stirred at rt for 2 h, concentrated, and purified by flash chromatography (silica gel, hexanes:ethyl acetate = 200:1) to give 1,3-diyne **4e** as a white solid (1.399 g, 83%).

### Characterization data

#### Table 2, entry 1

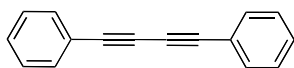

**1,4-Diphenylbuta-1,3-diyne:** White solid; mp 85-87 °C (lit. mp 88-89 °C); IR (film) 3050, 2150, 1592, 1485, 1439, 915, 756  $\text{cm}^{-1}$ ;  $^1\text{H}$  NMR (300 MHz,  $\text{CDCl}_3$ )  $\delta$  7.59-7.48 (m, 4H), 7.43-7.29 (m, 6H);  $^{13}\text{C}$  NMR (75 MHz,  $\text{CDCl}_3$ )  $\delta$  132.7, 129.4, 128.6, 122.0, 81.8, 74.2.

S. Zhang, X. Liu and T. Wang, *Adv. Synth. Catal.*, 2011, **353**, 1463–1466.

#### Table 2, entry 2

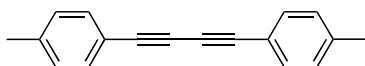

**1,4-Di-*p*-tolylbuta-1,3-diyne:** White solid; mp 183-184 °C (lit. mp 182-183 °C); IR (film) 2136, 1897, 1637, 1503, 1406, 809  $\text{cm}^{-1}$ ;  $^1\text{H}$  NMR (300 MHz,  $\text{CDCl}_3$ )  $\delta$  7.42 (d, *J*

= 8.1 Hz, 4H), 7.15 (d,  $J = 8.1$  Hz, 4H), 2.37 (s, 6H);  $^{13}\text{C}$  NMR (75 MHz,  $\text{CDCl}_3$ )  $\delta$  139.7, 132.6, 129.4, 119.0, 81.8, 73.7, 21.8.

S. Zhang, X. Liu and T. Wang, *Adv. Synth. Catal.*, 2011, **353**, 1463–1466.

**Table 2, entry 3**

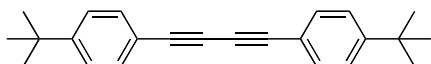

**1,4-Bis(4-*tert*-butylphenyl)buta-1,3-diyne:** Off-white solid; mp 195-196 °C; IR (film) 2959, 1462, 1364, 1267, 1103, 835  $\text{cm}^{-1}$ ;  $^1\text{H}$  NMR (300 MHz,  $\text{CDCl}_3$ )  $\delta$  7.49 (d,  $J = 8.1$  Hz, 4H), 7.37 (d,  $J = 8.1$  Hz, 4H), 1.34 (s, 18H);  $^{13}\text{C}$  NMR (75 MHz,  $\text{CDCl}_3$ )  $\delta$  152.8, 132.5, 125.7, 119.1, 81.7, 73.7, 35.1, 31.3.

(a) Z. Chen, H. Jiang, A. Wang and S. Yang, *J. Org. Chem.*, 2010, **75**, 6700–6703; (b) W. Susanto, C.-Y. Chu, W. J. Ang, T.-C. Chou, L.-C. Lo and Y. Lam, *J. Org. Chem.*, 2012, **77**, 2729–2742.

**Table 2, entry 4**

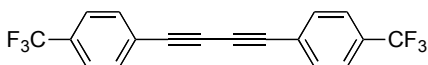

**1,4-Bis[4-(trifluoromethyl)phenyl]buta-1,3-diyne:** White solid; mp 165-167 °C (lit. mp 166-168 °C); IR (film) 2923, 1609, 1406, 1318, 1176, 1129, 1106, 1065, 839  $\text{cm}^{-1}$ ;  $^1\text{H}$  NMR (300 MHz,  $\text{CDCl}_3$ )  $\delta$  7.65 (d,  $J = 9.0$  Hz, 4H), 7.61 (d,  $J = 9.0$  Hz, 4H);  $^{13}\text{C}$  NMR (75 MHz,  $\text{CDCl}_3$ )  $\delta$  133.0, 131.3 (q,  $J = 32.8$  Hz), 125.7 (q,  $J = 3.7$  Hz), 125.5, 123.9 (q,  $J = 270.8$  Hz), 81.2, 75.9.

(a) S. V. Damle, D. Seomoon and P. H. Lee, *J. Org. Chem.*, 2003, **68**, 7085–7087; (b) K. Kude, S. Hayase, M. Kawatsura and T. Itoh, *Heteroat. Chem.*, 2011, **22**, 397–404.

**Table 2, entry 5**

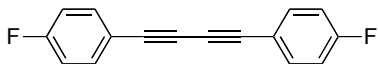

**1,4-Bis(4-fluorophenyl)buta-1,3-diyne:** White solid; mp 188-190 °C (lit. mp 194-195 °C); IR (film) 1888, 1595, 1502, 1225, 1158, 828  $\text{cm}^{-1}$ ;  $^1\text{H}$  NMR (300 MHz,  $\text{CDCl}_3$ )  $\delta$  7.57-7.45 (m, 4H), 7.10-6.98 (m, 4H);  $^{13}\text{C}$  NMR (75 MHz,  $\text{CDCl}_3$ )  $\delta$  163.3 (d,  $J = 250.1$  Hz), 134.8 (d,  $J = 8.6$  Hz), 118.1 (d,  $J = 3.5$  Hz), 116.1 (d,  $J = 22.2$  Hz), 80.7, 73.8.

(a) A. Kusuda, X.-H. Xu, X. Wang, E. Tokunaga and N. Shibata, *Green Chem.*, 2011, **13**, 843–846; (b) S. Zhang, X. Liu and T. Wang, *Adv. Synth. Catal.*, 2011, **353**, 1463–1466.

**Table 2, entry 6**

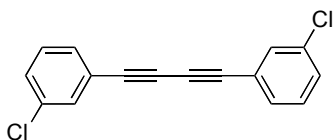

**1,4-Bis(3-chlorophenyl)buta-1,3-diyne:** Off-white solid; mp 71-72 °C (lit. mp 73 °C); IR (film) 1586, 1560, 1469, 1403, 876, 784 cm<sup>-1</sup>; <sup>1</sup>H NMR (300 MHz, CDCl<sub>3</sub>) δ 7.53-7.46 (m, 2H), 7.44-7.32 (m, 4H), 7.31-7.21 (m, 2H); <sup>13</sup>C NMR (75 MHz, CDCl<sub>3</sub>) δ 134.6, 132.5, 130.9, 129.9, 123.5, 80.8, 74.9.

(a) K. Kamata, S. Yamaguchi, M. Kotani, K. Yamaguchi and N. Mizuno, *Angew. Chem. Int. Ed.*, 2008, **47**, 2407–2410; (b) E. Merkul, D. Urselmann and T. J. J. Müller, *Eur. J. Org. Chem.*, 2011, 238–242.

**Table 2, entry 7**

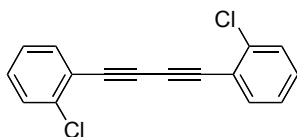

**1,4-Bis(2-chlorophenyl)buta-1,3-diyne:** White solid; mp 137-138 °C (lit. mp 138-140 °C); IR (film) 2924, 1559, 1465, 1071, 750 cm<sup>-1</sup>; <sup>1</sup>H NMR (300 MHz, CDCl<sub>3</sub>) δ 7.58 (dd, *J* = 7.8, 2.0 Hz, 2H), 7.42 (dd, *J* = 7.8, 1.5 Hz, 2H), 7.31 (td, *J* = 7.8, 2.0 Hz, 2H), 7.24 (td, *J* = 7.8, 1.5 Hz, 2H); <sup>13</sup>C NMR (75 MHz, CDCl<sub>3</sub>) δ 137.2, 134.6, 130.5, 129.7, 126.8, 122.0, 79.6, 78.6.

(a) S. V. Damle, D. Seomoon and P. H. Lee, *J. Org. Chem.*, 2003, **68**, 7085–7087; (b) S.-N. Chen, W.-Y. Wu and F.-Y. Tsai, *Green Chem.*, 2009, **11**, 269–274.

**Table 2, entry 8**

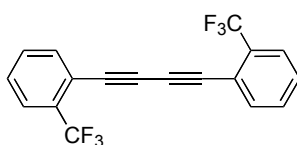

**1,4-Bis[2-(trifluoromethyl)phenyl]buta-1,3-diyne:** White solid; mp 70-71 °C (lit. mp 70.8-71.7 °C); IR (film) 1600, 1487, 1449, 1318, 1164, 1125, 1108, 762 cm<sup>-1</sup>; <sup>1</sup>H NMR (300 MHz, CDCl<sub>3</sub>) δ 7.74-7.63 (m, 4H), 7.57-7.43 (m, 4H); <sup>13</sup>C NMR (75 MHz, CDCl<sub>3</sub>) δ 135.4, 132.8 (q, *J* = 30.8 Hz), 131.7, 129.4, 126.3 (q, *J* = 5.1 Hz), 123.5 (q, *J* = 271.7 Hz), 119.9 (q, *J* = 2.3 Hz), 78.9, 78.8; HRMS Calcd for C<sub>18</sub>H<sub>12</sub>F<sub>6</sub>N (M+NH<sub>4</sub><sup>+</sup>): 356.0868. Found: 356.0859.

T. Kurita, M. Abe, T. Maegawa, Y. Monguchi and H. Sajiki, *Synlett*, 2007, 2521–2524.

**Table 2, entry 9**

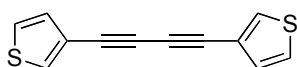

**1,4-Di(thiophen-3-yl)buta-1,3-diyne:** White solid; mp 109-111 °C (lit. mp 111.5-112.5 °C); IR (film) 3104, 2145, 1352, 1216, 1078, 929, 868, 783 cm<sup>-1</sup>; <sup>1</sup>H NMR (300 MHz, CDCl<sub>3</sub>) δ 7.59 (dd, *J* = 3.0, 1.2 Hz, 2H), 7.28 (dd, *J* = 5.1, 3.0 Hz, 2H), 7.18 (dd, *J* = 5.1, 1.2 Hz, 2H); <sup>13</sup>C NMR (75 MHz, CDCl<sub>3</sub>) δ 131.4, 130.4, 125.8, 121.1, 76.8, 73.7.

(a) J.-P. Beny, S. N. Dhawan, J. Kagan and S. Sundlass, *J. Org. Chem.*, 1982, **47**, 2201–2204; (b) A. Kusuda, X.-H. Xu, X. Wang, E. Tokunaga and N. Shibata, *Green Chem.*, 2011, **13**, 843–846.

**Table 2, entry 10**

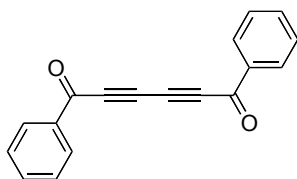

**1,6-Diphenylhexa-2,4-diyne-1,6-dione:** Yellow solid; mp 135-137 °C (lit. mp 136-138 °C); IR (film) 2135, 1638, 1450, 1236, 994, 697 cm<sup>-1</sup>; <sup>1</sup>H NMR (300 MHz, CDCl<sub>3</sub>) δ 8.18-8.06 (m, 4H), 7.72-7.62 (m, 2H), 7.58-7.47 (m, 4H); <sup>13</sup>C NMR (75 MHz, CDCl<sub>3</sub>) δ 176.2, 136.1, 135.3, 129.9, 129.1, 80.6, 74.2; HRMS Calcd for C<sub>18</sub>H<sub>11</sub>O<sub>2</sub> (M+H<sup>+</sup>): 259.0754. Found: 259.0755.

D. R. M. Walton and F. Waugh, *J. Organomet. Chem.*, 1972, **37**, 45–56.

**Table 2, entry 11**

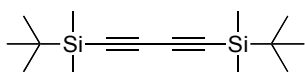

**1,4-Bis(*tert*-butyldimethylsilyl)buta-1,3-diyne:** White solid; mp 189-191 °C; IR (film) 2951, 2931, 2858, 2067, 1470, 1264, 809, 741 cm<sup>-1</sup>; <sup>1</sup>H NMR (300 MHz, CDCl<sub>3</sub>) δ 0.95 (s, 18H), 0.13 (s, 12H); <sup>13</sup>C NMR (75 MHz, CDCl<sub>3</sub>) δ 89.1, 84.2, 26.3, 17.0, -4.6.

M. Blangetti, A. Deagostino, H. Rosso, C. Prandi, C. Zavattaro and P. Venturello, *Eur. J. Org. Chem.*, 2007, 5867–5874.

**Table 2, entry 12**

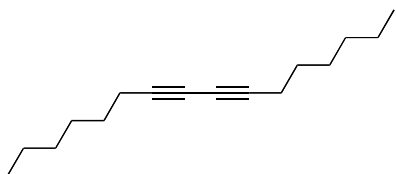

**Hexadeca-7,9-diyne:** Colorless oil; IR (film) 2957, 2932, 2860, 2234, 1710, 1459, 1239, 725 cm<sup>-1</sup>; <sup>1</sup>H NMR (300 MHz, CDCl<sub>3</sub>) δ 2.24 (t, *J* = 6.9 Hz, 4H), 1.58-1.19 (m, 16H), 0.88 (t, *J* = 6.9 Hz, 6H); <sup>13</sup>C NMR (75 MHz, CDCl<sub>3</sub>) δ 77.7, 65.5, 31.5, 28.7, 28.5, 22.7, 19.4, 14.2.

S. Zhang, X. Liu and T. Wang, *Adv. Synth. Catal.*, 2011, **353**, 1463–1466.

**Table 2, entry 13**

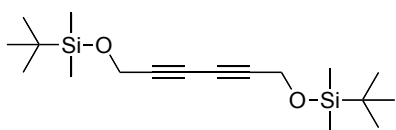

**2,2,3,3,12,12,13,13-Octamethyl-4,11-dioxa-3,12-disilatetradeca-6,8-diyne:** White solid; mp 38-39 °C; IR (film) 2957, 2931, 2859, 1472, 1363, 1256, 1091, 836, 778 cm<sup>-1</sup>; <sup>1</sup>H NMR (300 MHz, CDCl<sub>3</sub>) δ 4.37 (s, 4H), 0.90 (s, 18H), 0.12 (s, 12H); <sup>13</sup>C NMR (75 MHz, CDCl<sub>3</sub>) δ 77.8, 69.4, 52.3, 26.0, 18.5, -5.0; HRMS Calcd for C<sub>18</sub>H<sub>35</sub>O<sub>2</sub>Si<sub>2</sub> (M+H<sup>+</sup>): 339.2170. Found: 339.2162.

C. H. Oh and V. R. Reddy, *Tetrahedron Lett.*, 2004, **45**, 5221–5224.

**Table 2, entry 14**

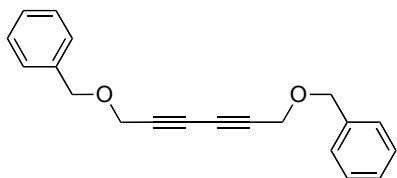

**1,6-Bis(benzyloxy)hexa-2,4-diyne:** Light yellow oil; IR (film) 3032, 2863, 2243, 1727, 1454, 1348, 1073, 739, 698  $\text{cm}^{-1}$ ;  $^1\text{H}$  NMR (300 MHz,  $\text{CDCl}_3$ )  $\delta$  7.43-7.29 (m, 10H), 4.63 (s, 4H), 4.28 (s, 4H);  $^{13}\text{C}$  NMR (75 MHz,  $\text{CDCl}_3$ )  $\delta$  137.2, 128.7, 128.3, 128.2, 75.6, 72.0, 70.8, 57.7.

W. Yin, C. He, M. Chen, H. Zhang and A. Lei, *Org. Lett.*, 2009, **11**, 709–712.

**Table 2, entry 15**

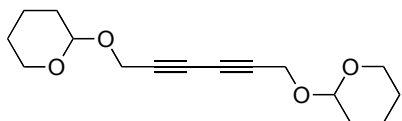

**1,6-Bis(tetrahydro-2H-pyran-2-yloxy)hexa-2,4-diyne:** Light yellow oil; IR (film) 2944, 1729, 1343, 1202, 1120, 1026, 902  $\text{cm}^{-1}$ ;  $^1\text{H}$  NMR (300 MHz,  $\text{CDCl}_3$ )  $\delta$  4.78 (t,  $J$  = 3.0 Hz, 2H), 4.30 (s, 4H), 3.86-3.72 (m, 2H), 3.57-3.45 (m, 2H), 1.88-1.43 (m, 12H);  $^{13}\text{C}$  NMR (75 MHz,  $\text{CDCl}_3$ )  $\delta$  97.1, 75.4, 70.2, 62.2, 54.6, 30.3, 25.5, 19.1.

(a) F. Nador, L. Fortunato, Y. Moglie, C. Vitale and G. Radivoy, *Synthesis*, 2009, 4027–4031; (b) W. Yin, C. He, M. Chen, H. Zhang and A. Lei, *Org. Lett.*, 2009, **11**, 709–712.

STANDARD 1H OBSERVE  
Pulse Sequence: s2pul1  
Solvent: CDCl3  
Acquire Temperature: 300.2 K  
Product: spox1de  
INOVA-500  
Relax. delay 1.000 sec  
Pulse 49.6 degrees  
Acq. time 1.998 sec  
Mdn 4900.5 Hz  
OBSERVE: H1, 900.1592196 MHz  
DATA PROCESSING  
FT size 32768  
Total time 0 min, 12 sec

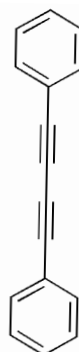

Table 2, entry 1

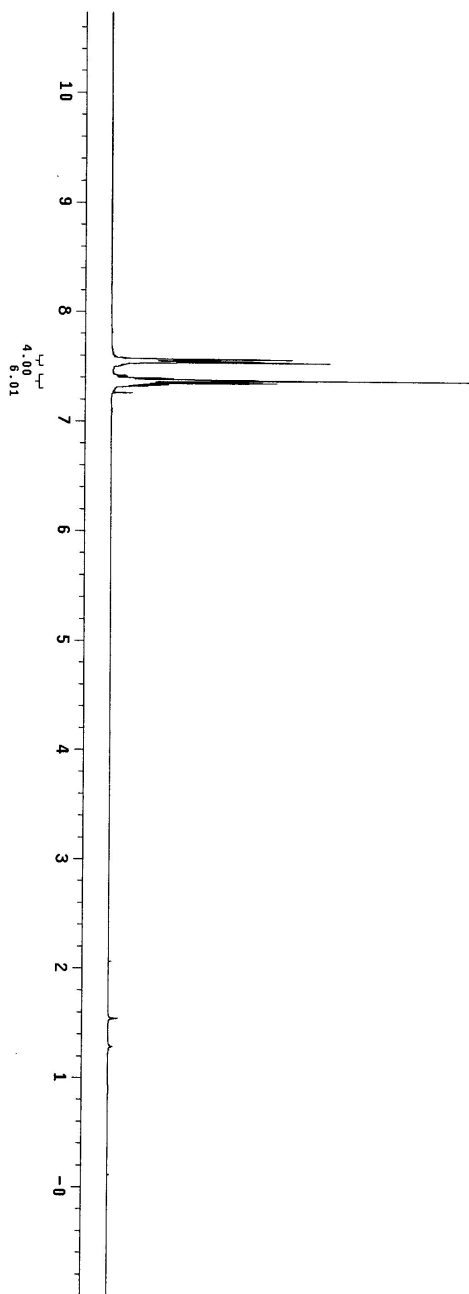



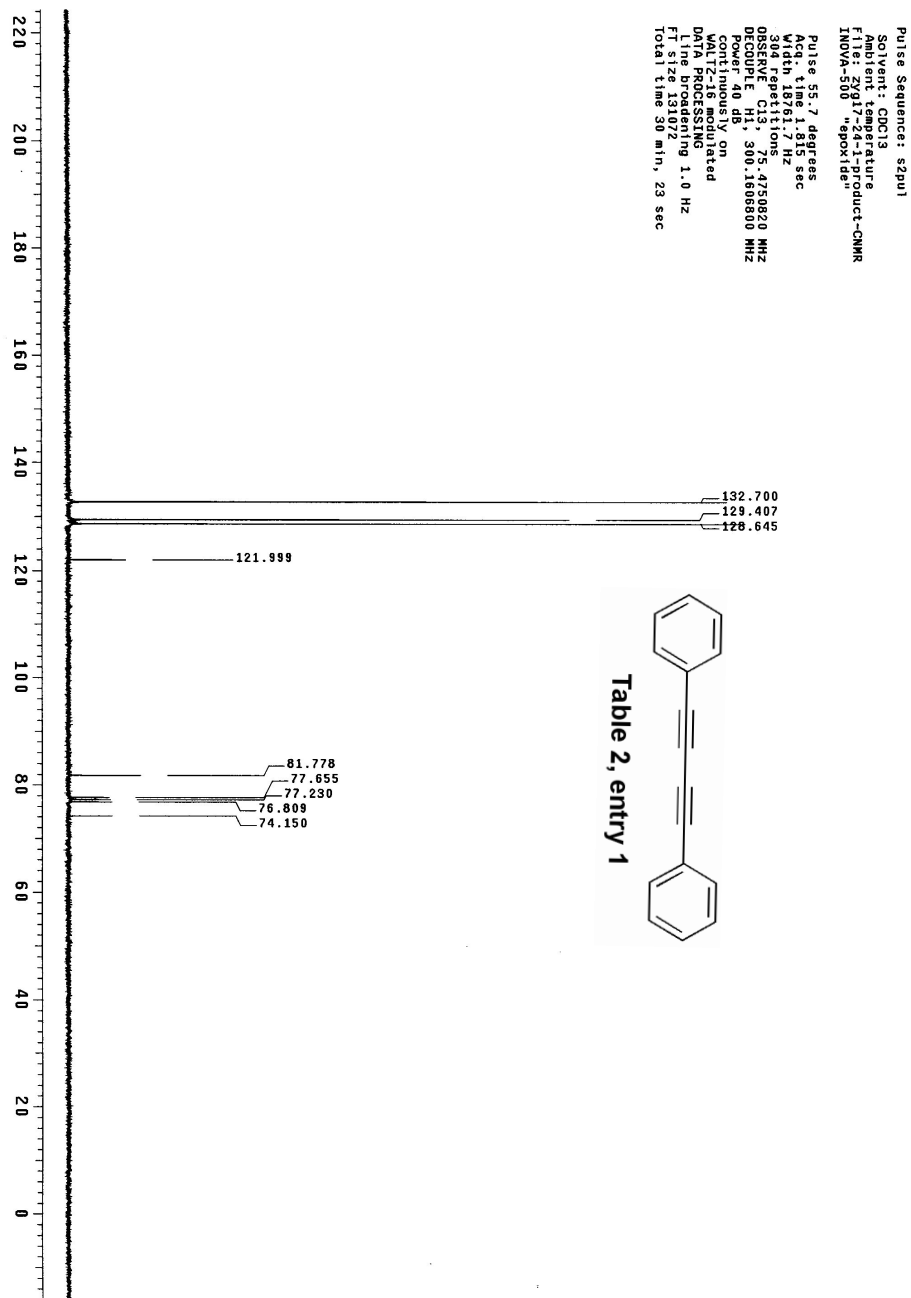

STANDARD 1H OBSERVE  
Pulse Sequence: szpul  
Solvent: CDCl3  
Ambient temperature  
File: ZYG17-41-Product-HNMR  
INOVA-500 \*epoxide\*  
Pulse delay: 1.000 sec  
Pulse: 49.64 degrees  
Acq. time: 1.998 sec  
Width: 4500.5 Hz  
Acquisition: 900.1592196 MHz  
DATA PROCESSING  
FT size: 32768  
Total time: 0 min, 12 sec

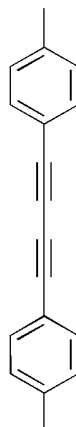

Table 2, entry 2

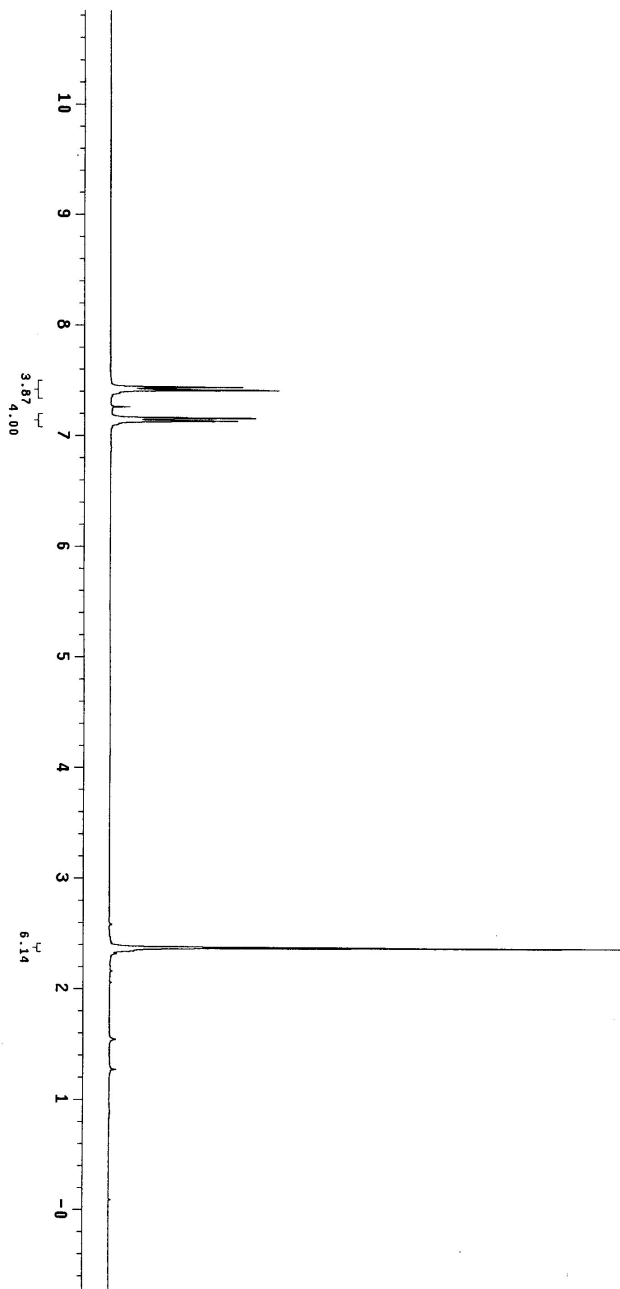

13C OBSERVE  
Pulse Sequence: szpu1  
Solvent: CDCl3  
Ambient temperature  
File: ZYG17-41-Product-CMNR  
INOVA-500 \*epoxide\*  
Pulse: 55.7 degrees  
Width: 12.21 Hz  
Width: 18.61 Hz  
320 Repetitions  
OBSERVE: Q13, 75.4750794 MHz  
DECOUPLE: H1, 300.1605800 MHz  
CONTINUOUSLY ON  
WALTZ-16 modulated  
DATA PROCESSING  
Line broadening 1.0 Hz  
File size: 131072  
Total time: 90 min, 23 sec

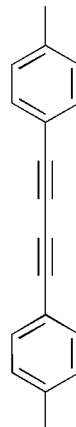

Table 2, entry 2

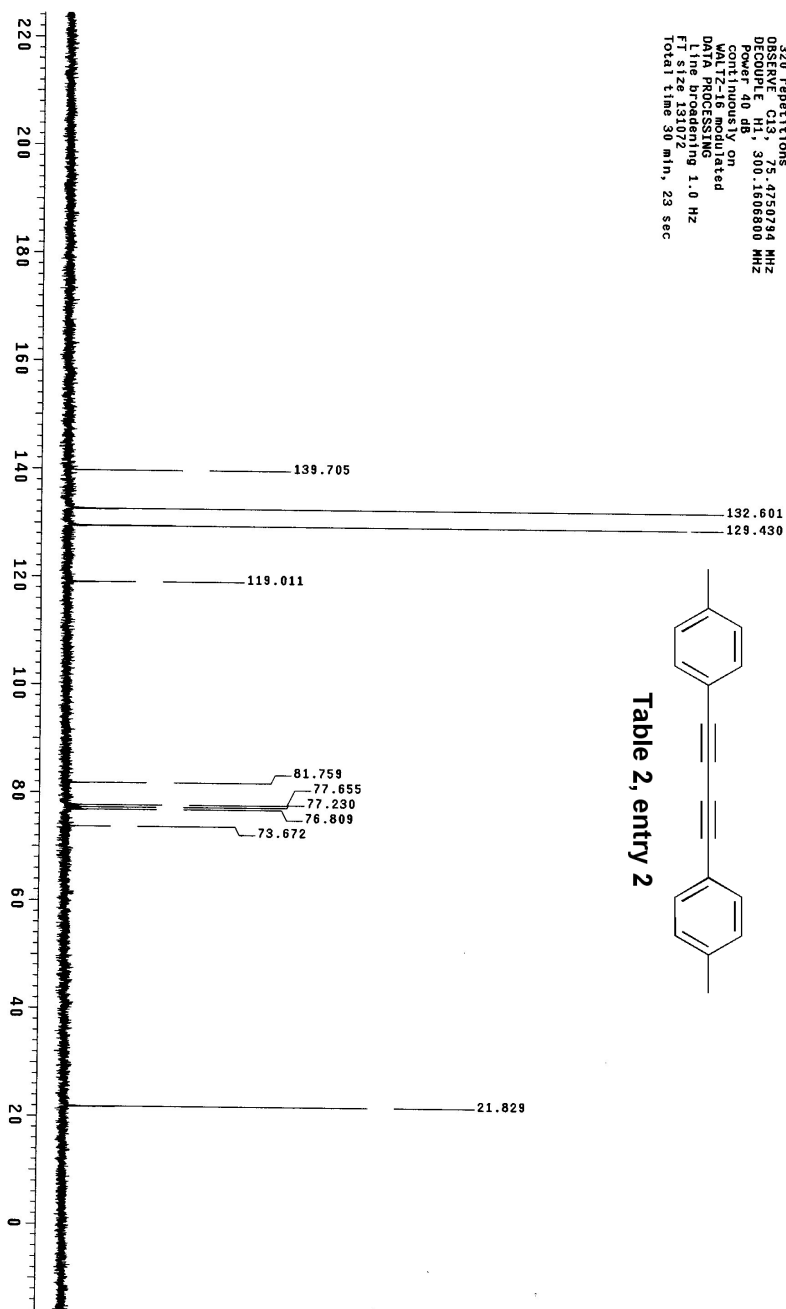

STANDARD 1H OBSERVE  
Pulse Sequence: s2pu1  
Solvent: CDCl3  
Sample Name: 4-tert-butylphenylacetylene  
File: ZY017-44-product-HNMR  
INOVA-500 "epoxide"  
Relax. delay: 1.000 sec  
Pulse: 49.6 degrees  
Width: 1.995 sec  
Waltz: 4500 Hz  
4 Repetitions  
OBSERVE: H1, 300.1592196 MHz  
DATA PROCESSING  
12e 32/78  
Total time: 0 min, 12 sec

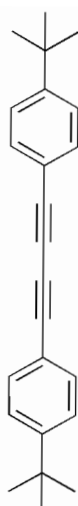

Table 2, entry 3

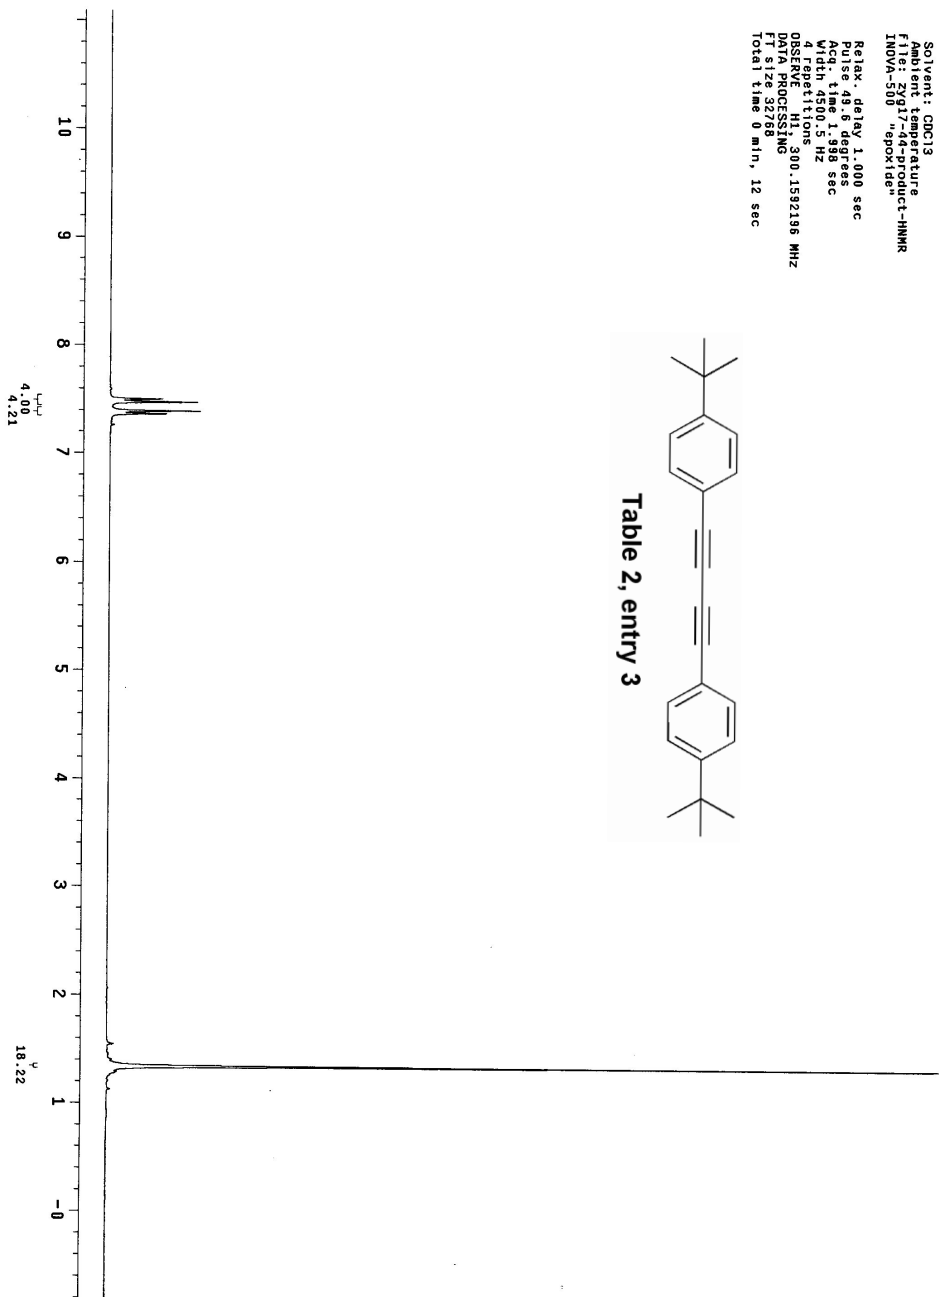

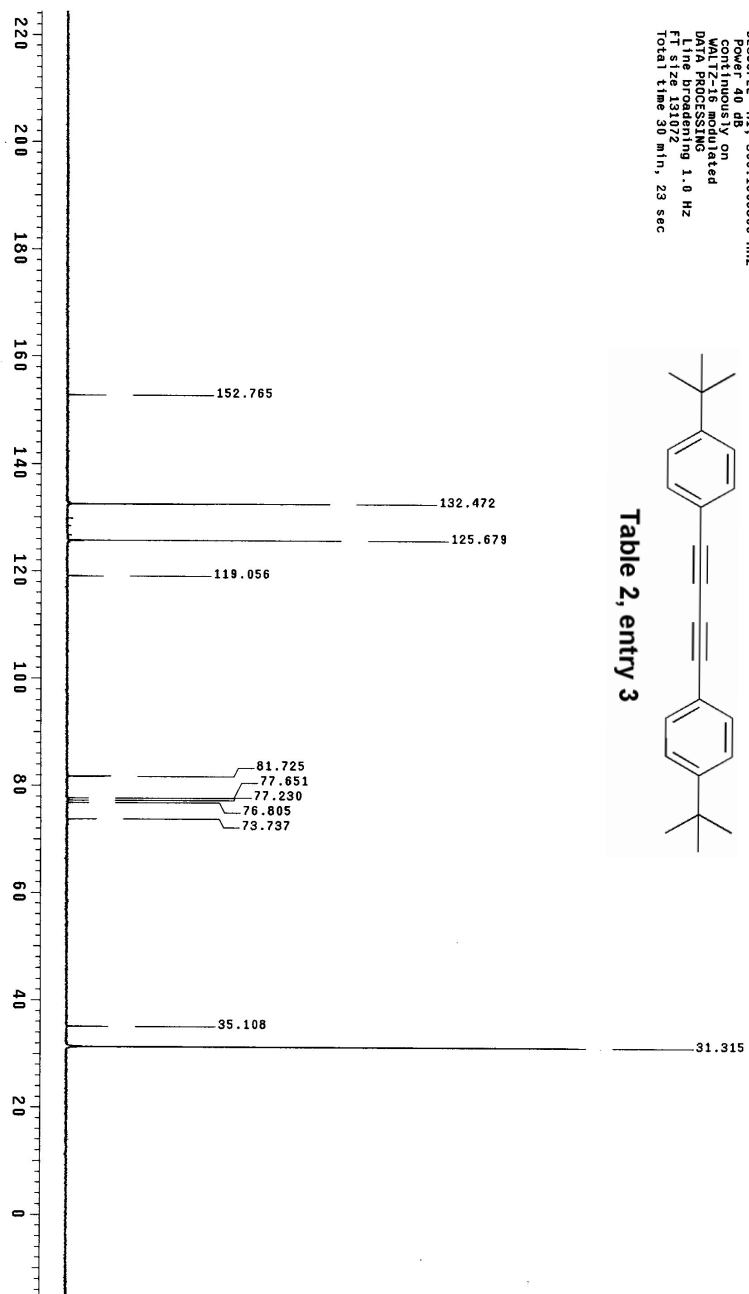

STANDARD 1H OBSERVE  
Pulse Sequence: szpu1  
Solvent: CDCl3  
Ambient Temperature  
File: ZY42-12-Product-HNMR  
INOVA-500 "epoxide"  
Relax. delay 1.000 sec  
Pulse 49.6 degrees  
Acq. time 1.989 sec  
F1 size 32768  
10 repetitions  
OBSERVE HI 300.1592196 MHz  
DATA PROCESSING  
F1 size 32768  
Total time 0 min, 30 sec

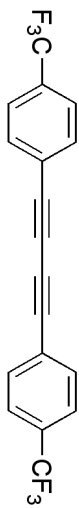

Table 2, entry 4

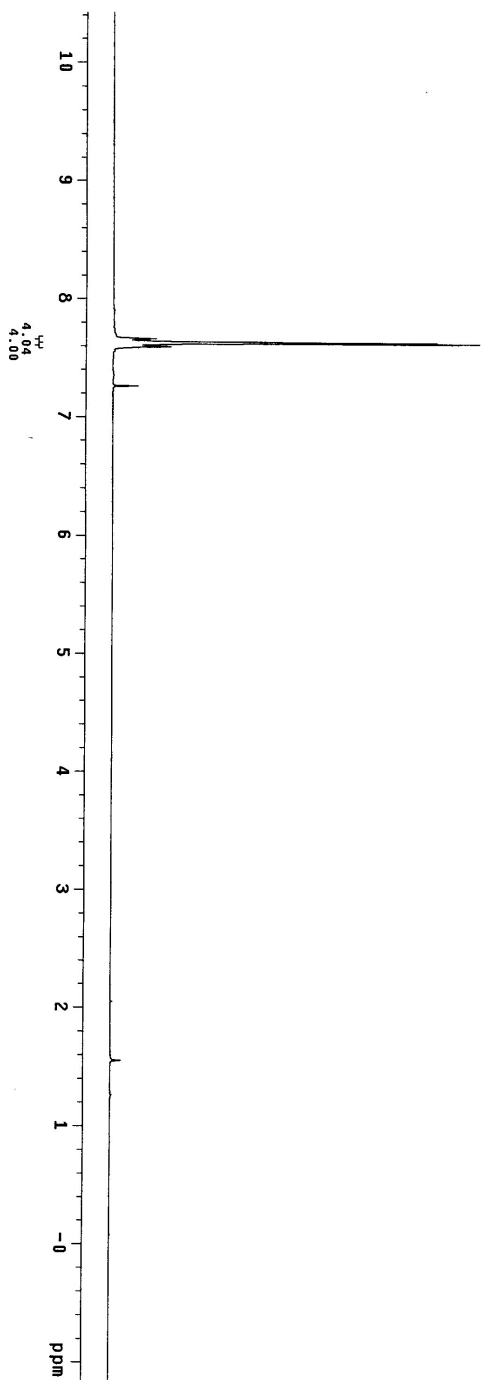

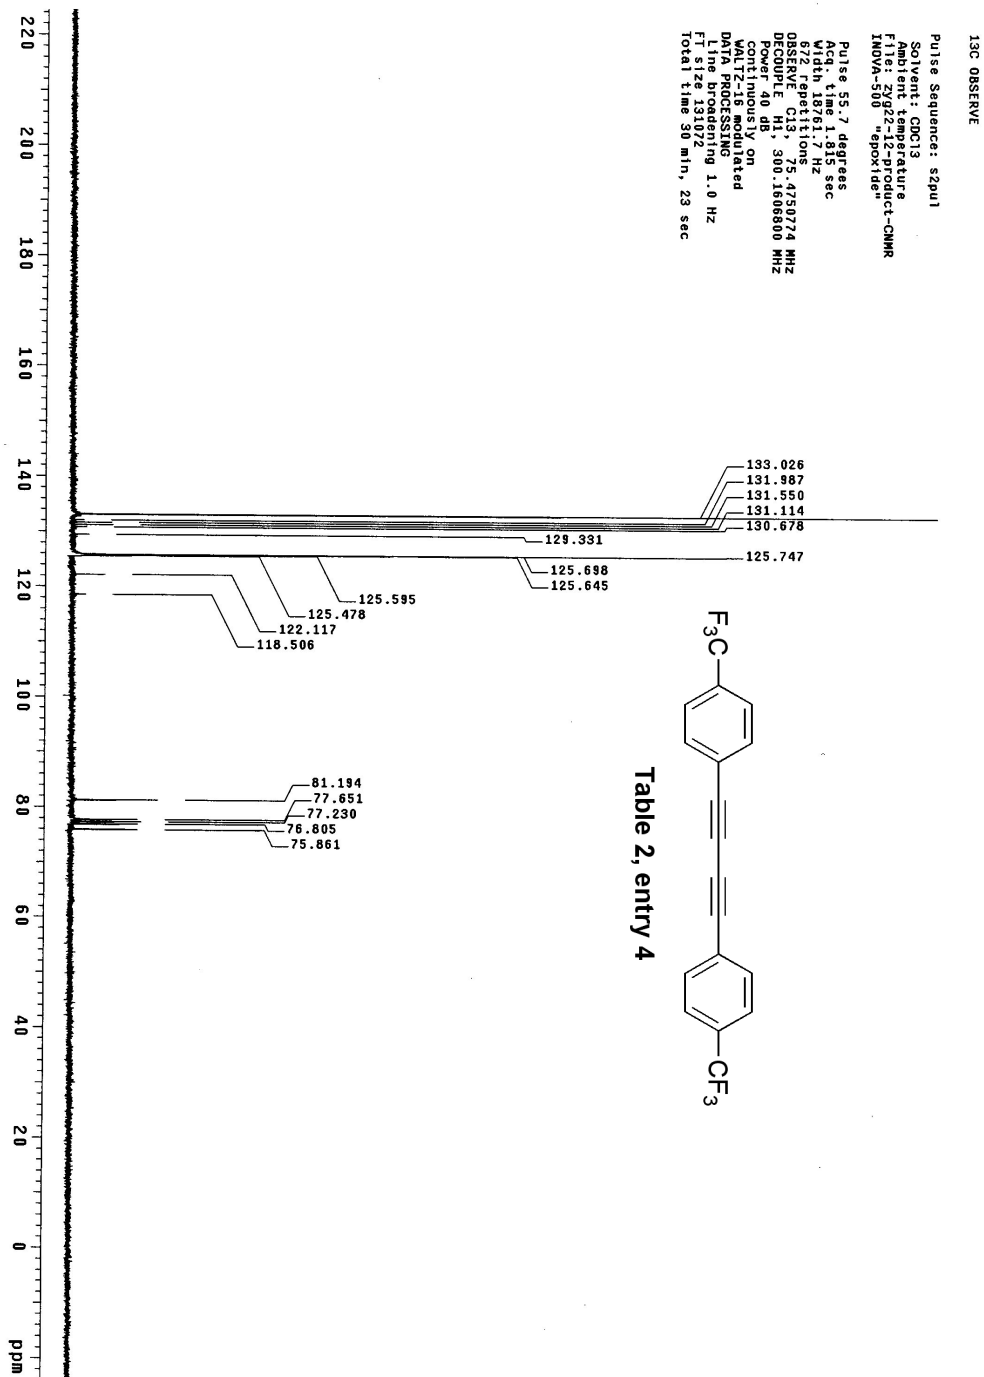

Table 2, entry 4

STANDARD 1H OBSERVE  
Pulse Sequence: szpu1  
Solvent: CDCl3  
Ambient temperature  
File: ZYG17-42-Product-HMNR  
INOVA-500 "epox1de"  
Relax: delay 1.000 sec  
Pulse: 4.000 sec  
Acq: time 1.896 sec  
Width 4500.5 Hz  
4 repetitions  
OBSERVE: H1, 300.1592196 MHz  
DATA PROCESSING  
Total time 0 min, 12 sec

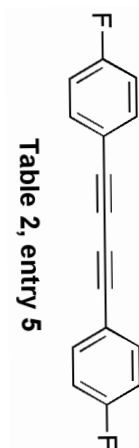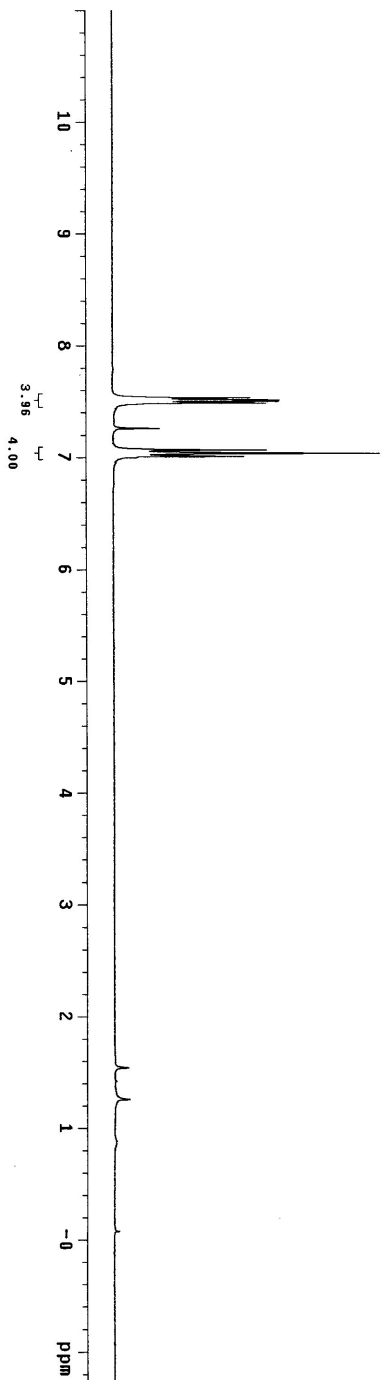



13C OBSERVE  
Pulse Sequence: szpu1  
Solvent: CDCl3  
Ambient temperature  
File: ZYG17-42-product-CNMR  
INOVA-500 "epoxide"  
Pulse 55.7 degrees  
Acq. time 1.913 sec  
Acq. date 12/17/12  
656 Repetitions  
OBSERVE C13, 75.4750777 MHZ  
DECUPLE H1, 300.1606800 MHZ  
Power 40 dB  
WALTZ16  
NUC1: 13C  
DATA PROCESSING  
Line broadening 1.0 Hz  
FI size 131072  
Total time 30 min, 23 sec

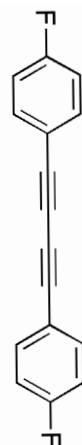

Table 2, entry 5

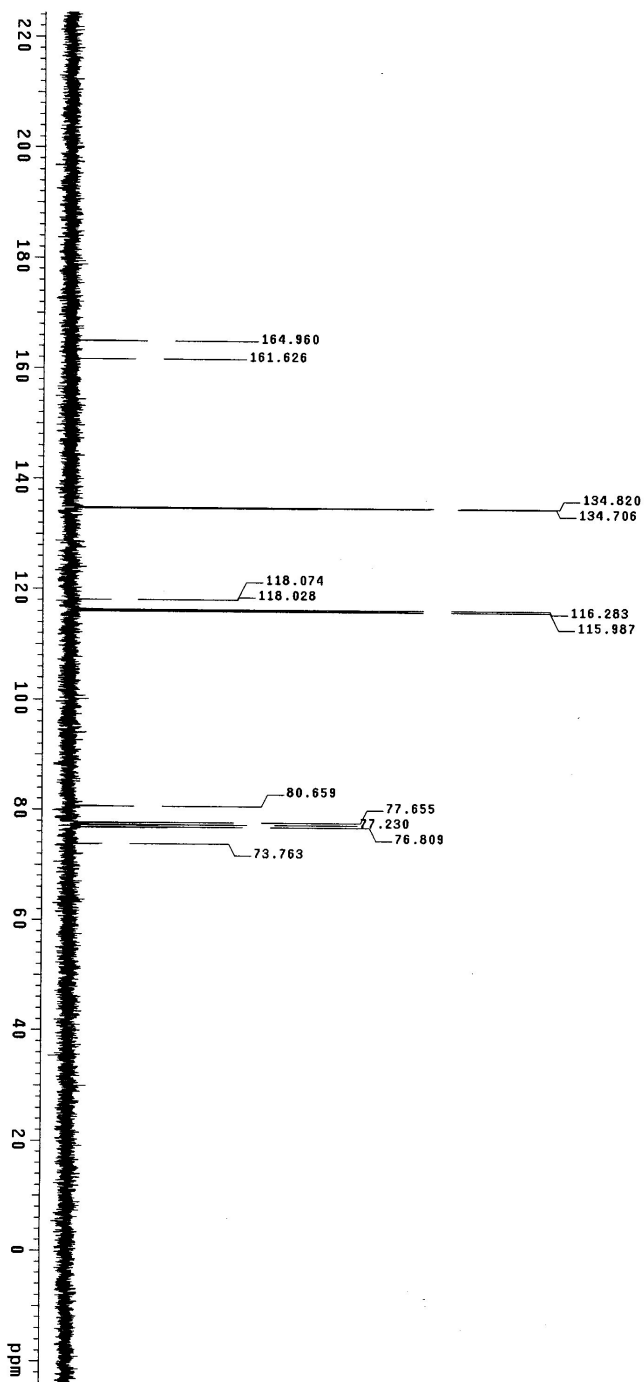

STANDARD 1H OBSERVE  
Pulse Sequence: s2pu1  
Solvent: CDCl3  
Ambient temperature  
File: ZYG17-49-product-HNMR  
INOVA-500 "epox1de"  
Relax. delay: 1.000 sec  
Acq. time: 1.998 sec  
Acq. time: 1.998 sec  
Width: 4500.5 Hz  
4 repetitions  
OBSERVE: H1, 300.1592196 MHz  
DATA PROCESSING  
F1: 1200558  
Total time: 0 min, 12 sec

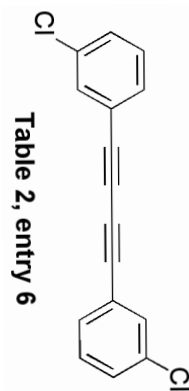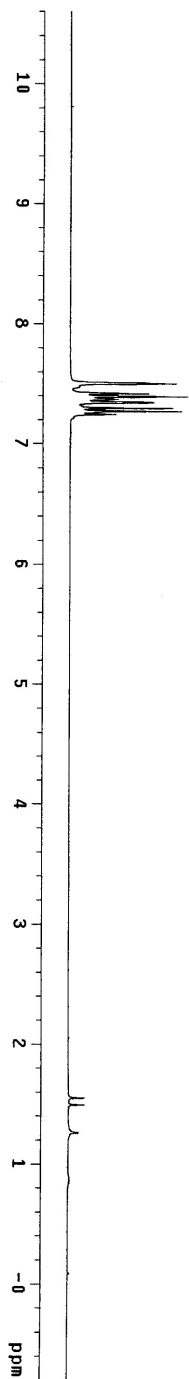

13C OBSERVE

Pulse Sequence: szpu1  
Solvent: CDCl3  
Ambient temperature  
File: ZYG17-49-product-CNMR  
INOVA-500 "epoxide"

Pulse 55.7 degrees  
Acq. time 1.915 sec  
Acq. date 11/11/12  
256 Repetitions  
OBSERVE C13, 75.4750803 MHz  
DECUPLE H1, 300.1606800 MHz  
Power 40 dB  
SOLVENT NS  
WALTZ16 ON  
MAGNETICALLY  
DATA PROCESSING  
Line broadening 1.0 Hz  
F1 size 131072  
Total time 30 min, 23 sec

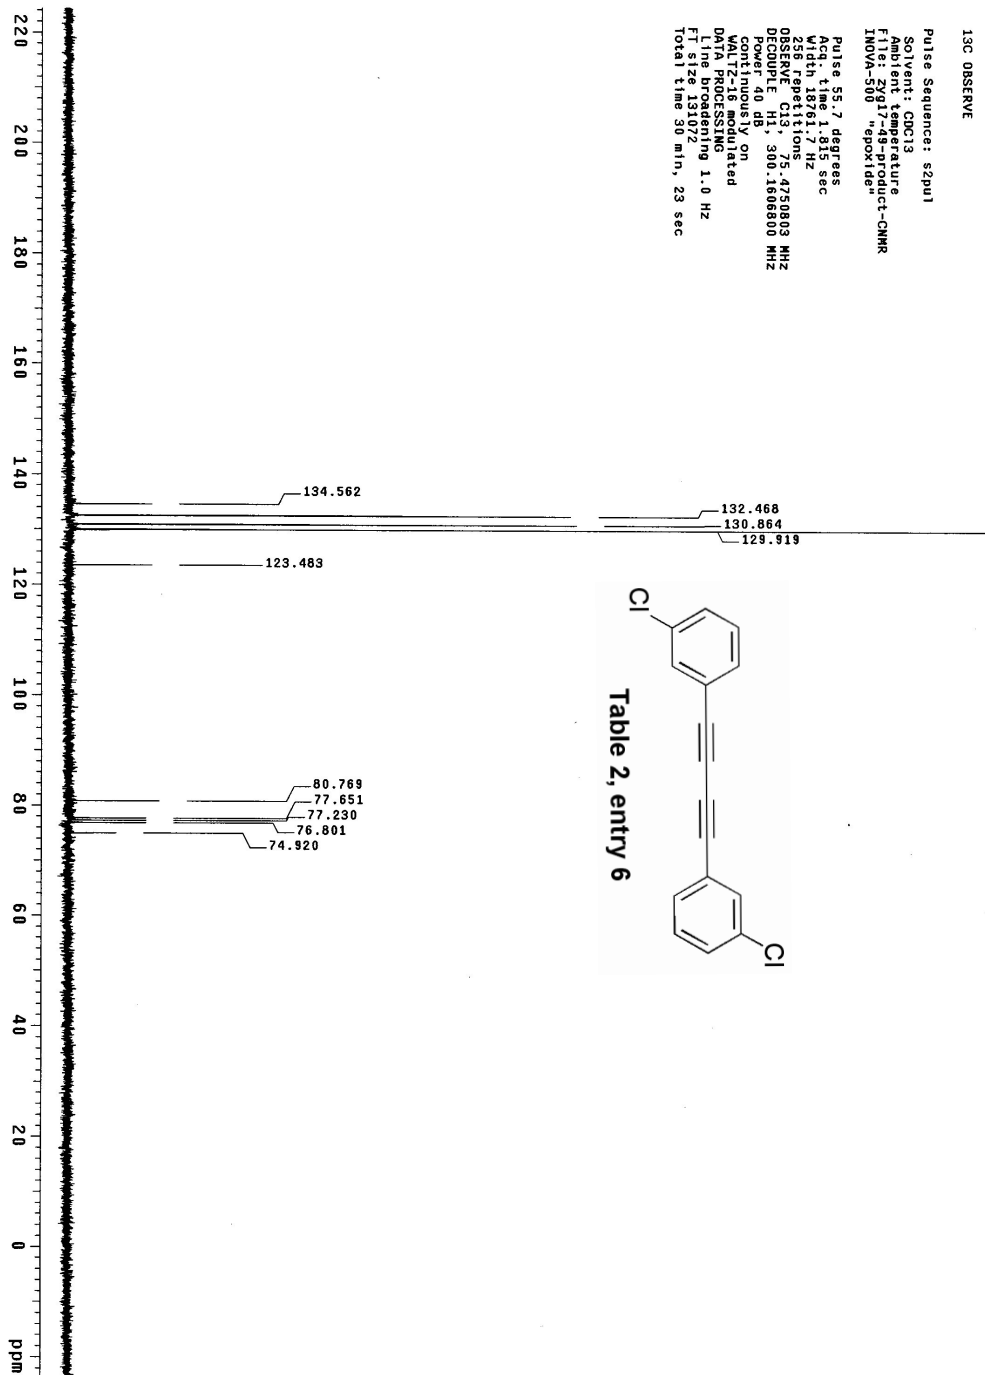

STANDARD 1H OBSERVE  
Pulse Sequence: szpu1  
Solvent: CDCl3  
Ambient temperature  
File: zyg17-48-2-1HMR  
INOVA-500 "epoxide"  
Relax : delay 1.000 sec  
Pulse : 49.6 degrees  
Pulse program : zgpg30  
Width : 4500.5 Hz  
4 repetitions  
OBSERVE : H1, 300.1592196 MHz  
DATA PROCESSING  
F1 size 32768  
Total time 0 min, 12 sec

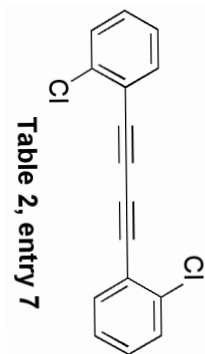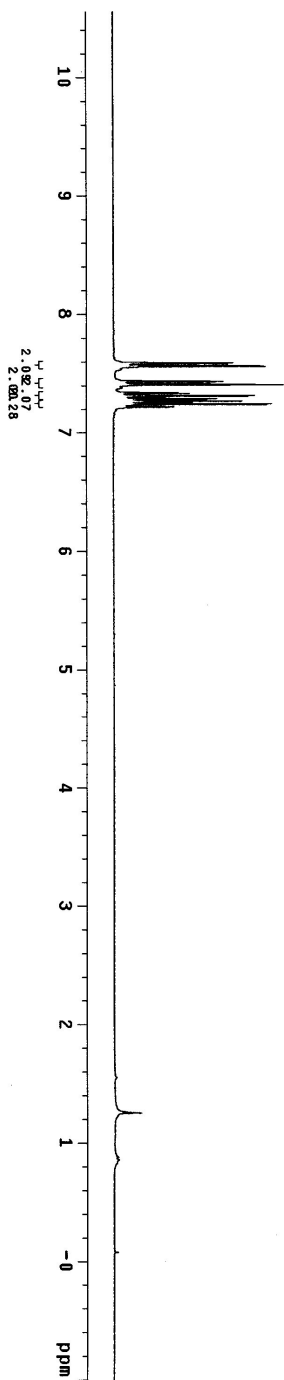

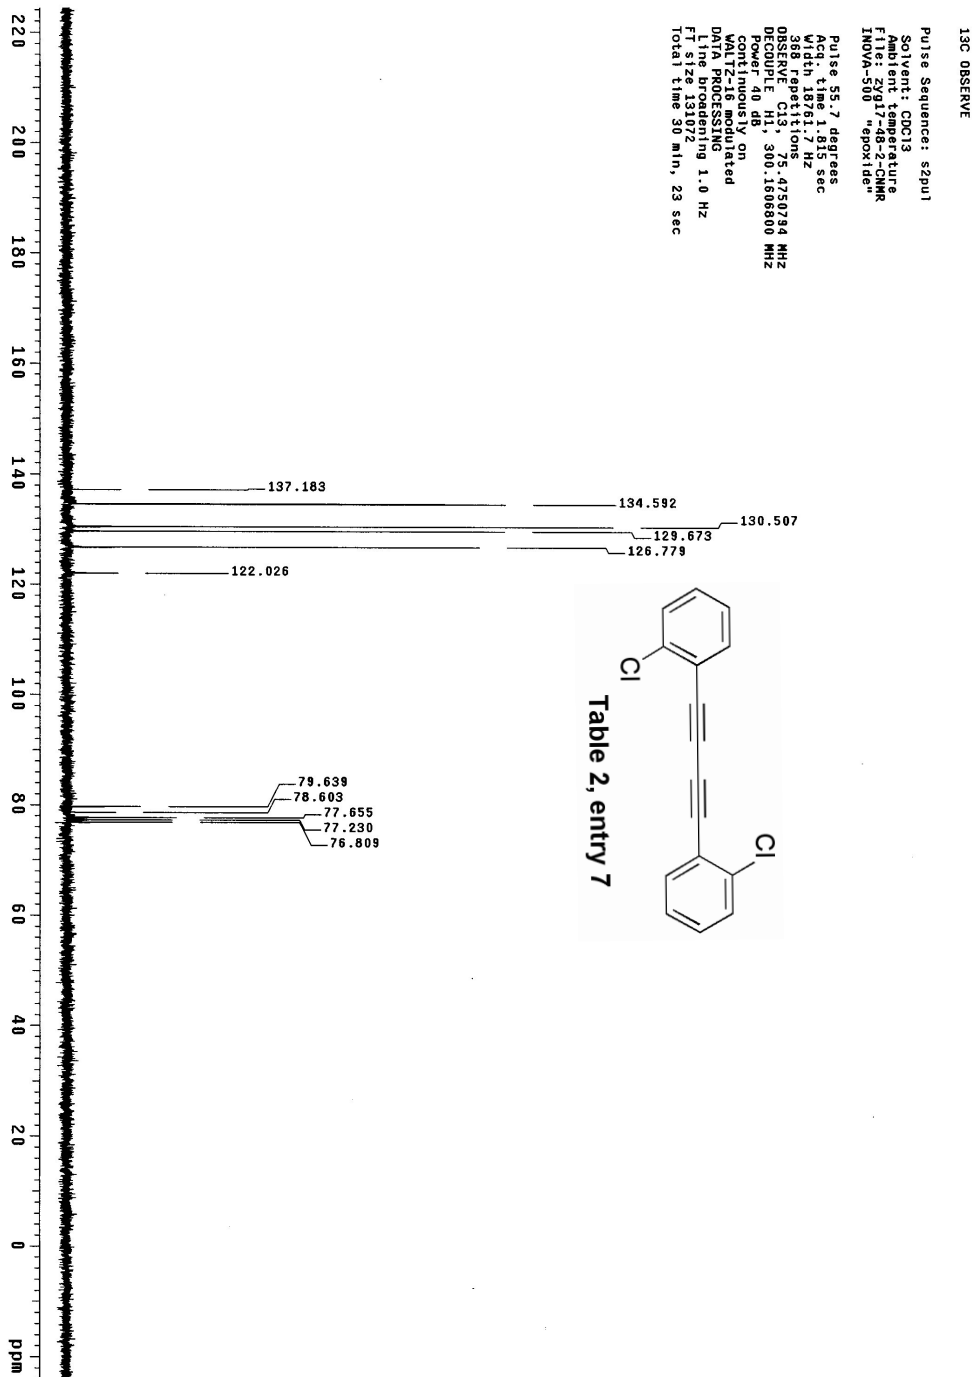

STANDARD 1H OBSERVE  
Pulse Sequence: s2pul  
Solvent: CDCl3  
Ambient temperature  
File: ZYG18-13-1-HNMR  
INOVA-500 "epoxide"  
Relax. delay 1.000 sec  
Pulse 49.6 degrees  
Acq. 490.139 sec  
Wdth 490.139 Hz  
4 repetitions  
OBSERVE H1, 300.1592196 MHz  
DATA PROCESSING  
FT size 32768  
Total time 0 min, 12 sec

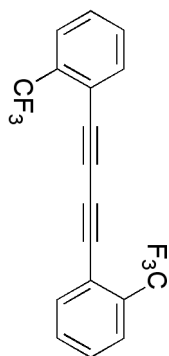

Table 2, entry 8

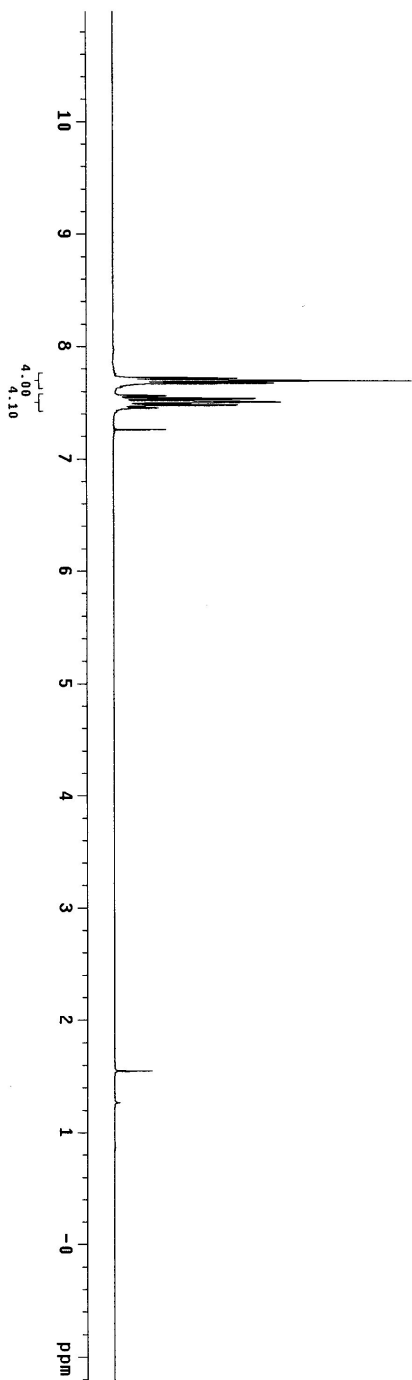

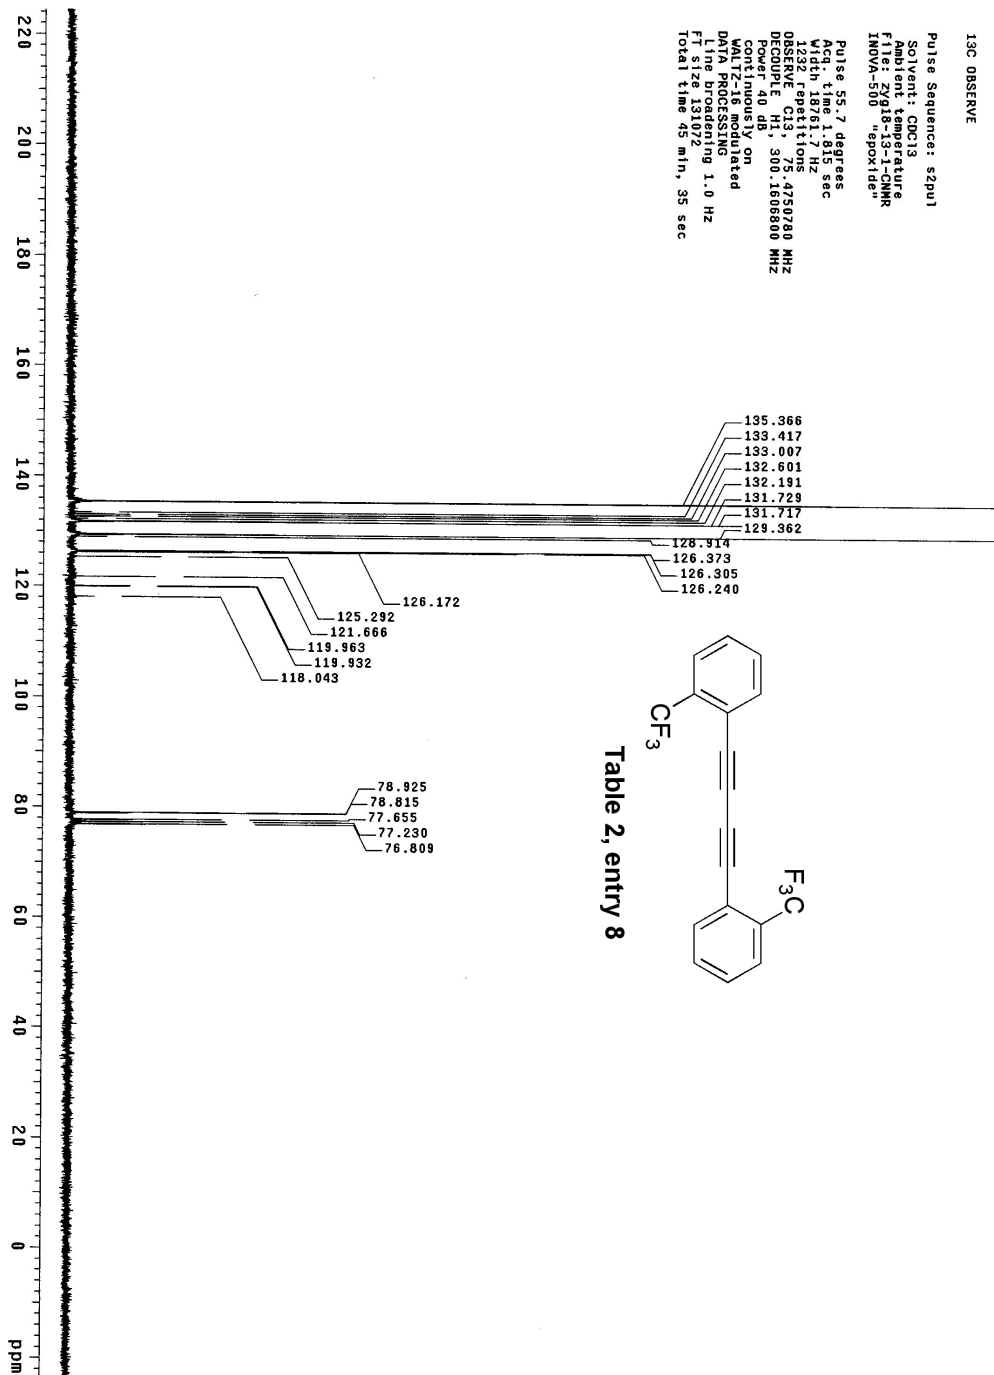

STANDARD 1H OBSERVE  
Pulse Sequence: szpu1  
Solvent: CDCl3  
Ambient temperature  
File: ZYG17-26-product-HNMR  
INOVA-500 "epoxide"  
Relax - delay 1.000 sec  
Pulse - delay 0.100 sec  
Acq - time 0.149 sec  
Width 4500.5 Hz  
10 repetitions  
OBSERVE H1,300.1592186 MHz  
P1/P1A P0.0255240  
Total time 0 min, 30 sec

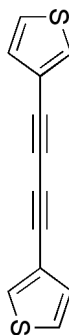

Table 2, entry 9

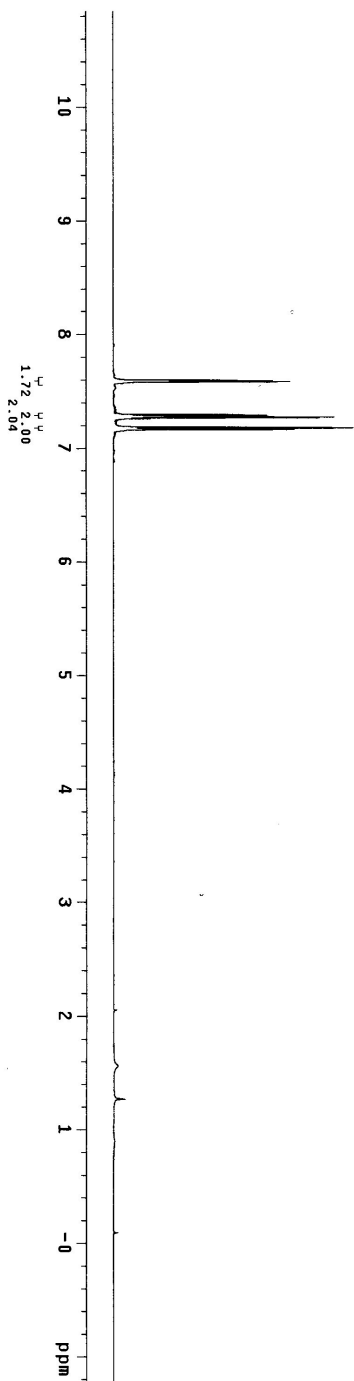



13C OBSERVE

Pulse Sequence: s2pu1  
Solvent: CDCl3  
Ambient temperature  
File: ZYG17-26-product-CNMR  
INDVA-500 "epoxide"

Pulse 55.7 degrees  
Acq. time 1.815 sec  
Date\_ 17/11/12  
320 repetitions  
OBSERVE C13, 75.4750823 MHZ  
DECUPLE H1, 300.1606800 MHZ  
Power 40 dB  
CONTINUOUSLY ON  
WENT UNACQUIRED  
DATA PROCESSING  
Line broadening 1.0 Hz  
FT size 131072  
Total time 30 min, 23 sec

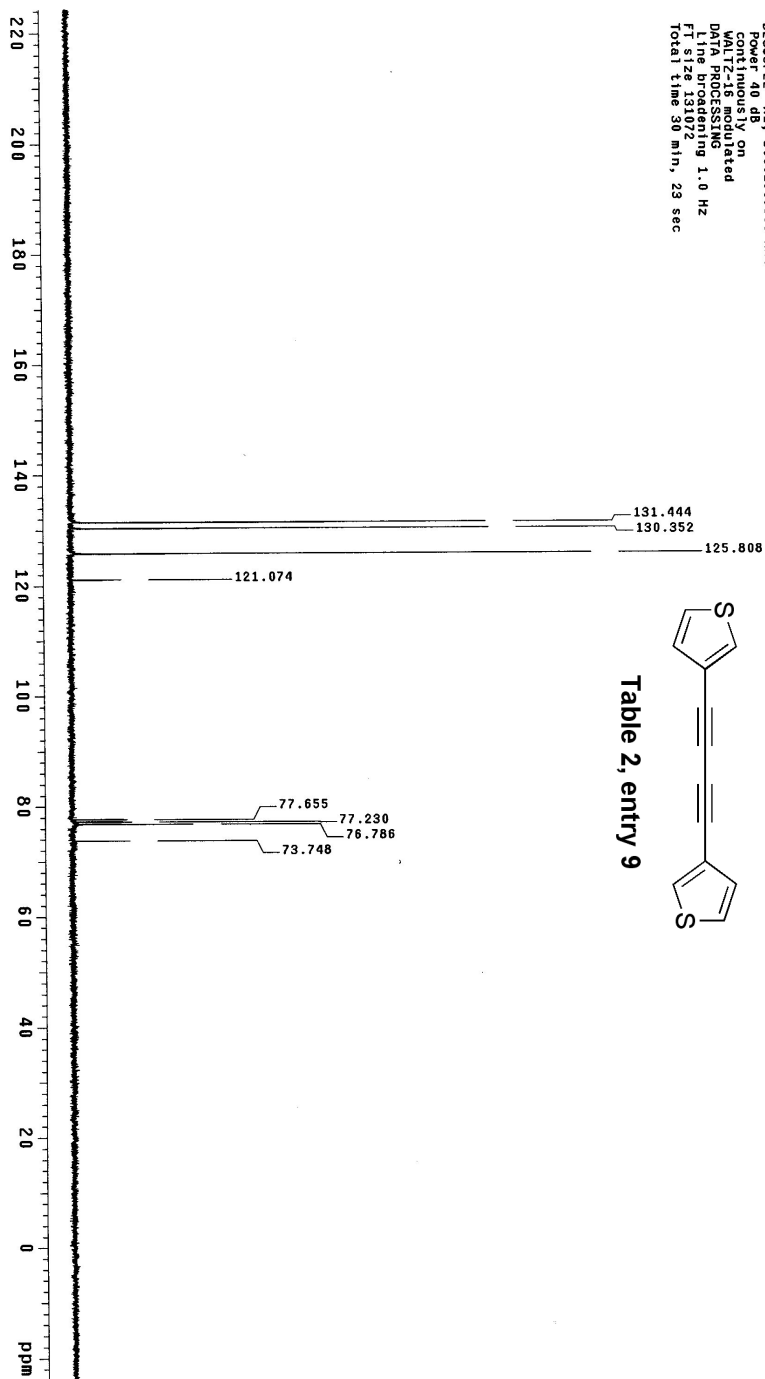

STANDARD 1H OBSERVE  
Pulse Sequence: s2put1  
Solvent: CDCl3  
Temperature: 300.15 K  
F1 (nucl): 1H  
INOVA-500 "epoxide"  
Relax. delay: 1.000 sec  
Pulse: 49.6 degrees  
Acq. time: 1.998 sec  
Width: 4500.5 Hz  
SFO: 300.152136 MHz  
OBSERVE: 1H  
DATA PROCESSING  
FT size: 32788  
Total time: 0 min, 12 sec

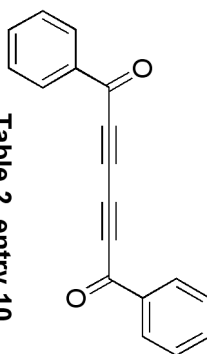

Table 2, entry 10

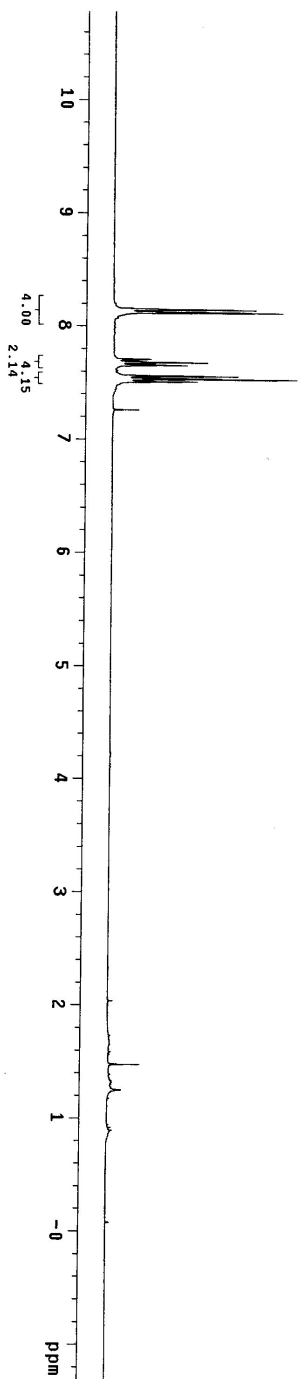

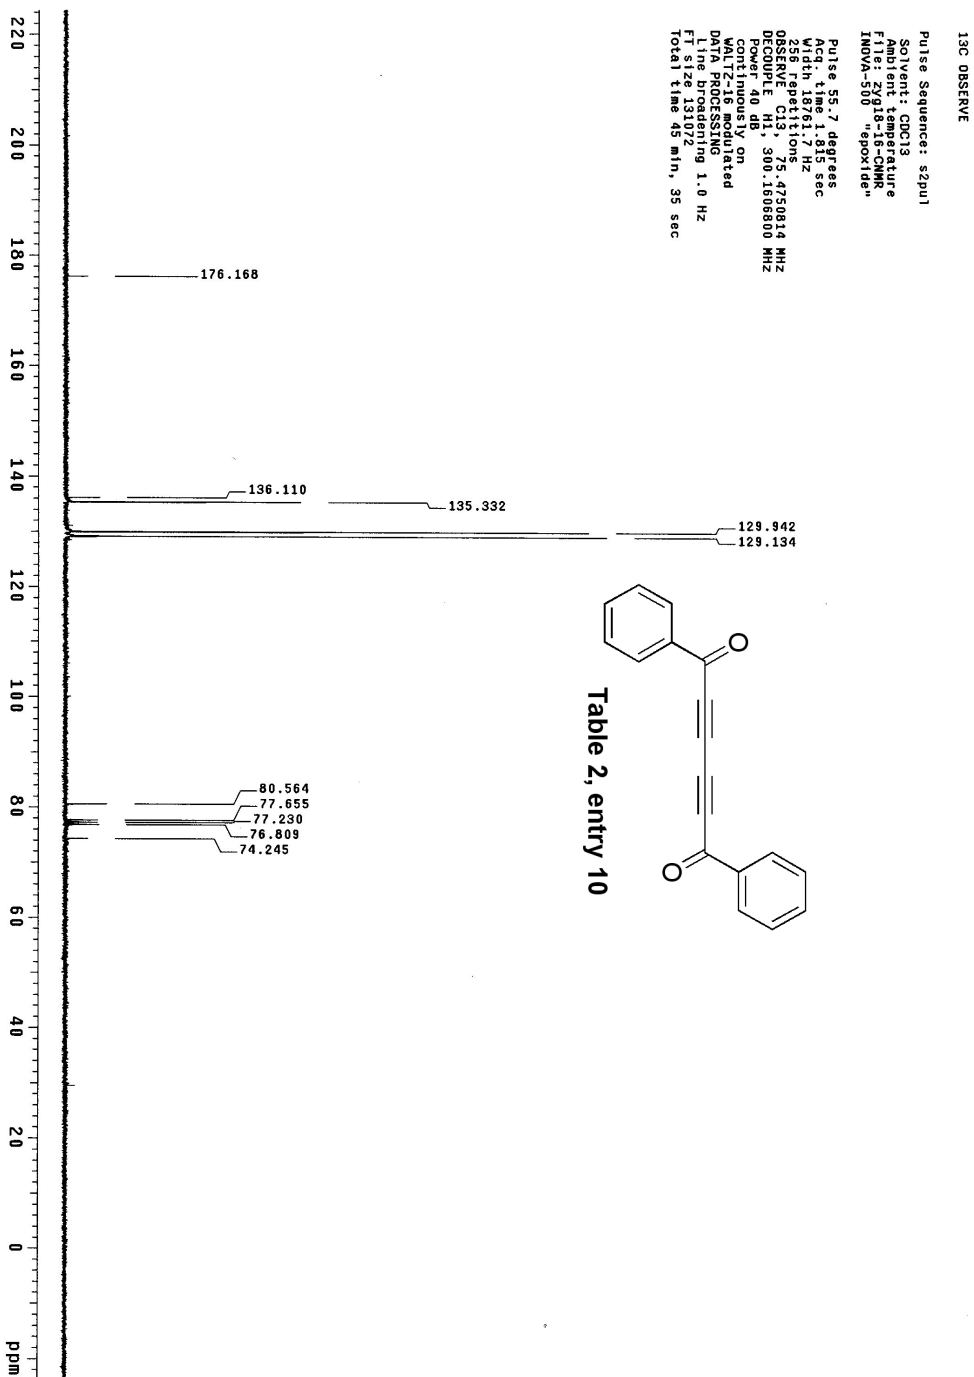



13C OBSERVE

Pulse Sequence: s2pu1  
Solvent: CDCl3  
Amplifier temperature  
F1: 101.625 MHz  
F2: 101.625 MHz  
INSTR: spect  
Pulse 55.7 degrees  
Acq. time 1.815 sec  
Width 18761.7 Hz  
320 repetitions  
DESCRF: C13, 75.476265 MHz  
DESCRF: C13, 300.1368500 MHz  
Power 40 dB  
Continuously on  
WALTZ-16 modulated  
DATA PROCESSING  
F1: 101.625 MHz  
F2: 101.625 MHz  
Total time 30 min, 23 sec

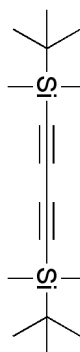

Table 2, entry 11

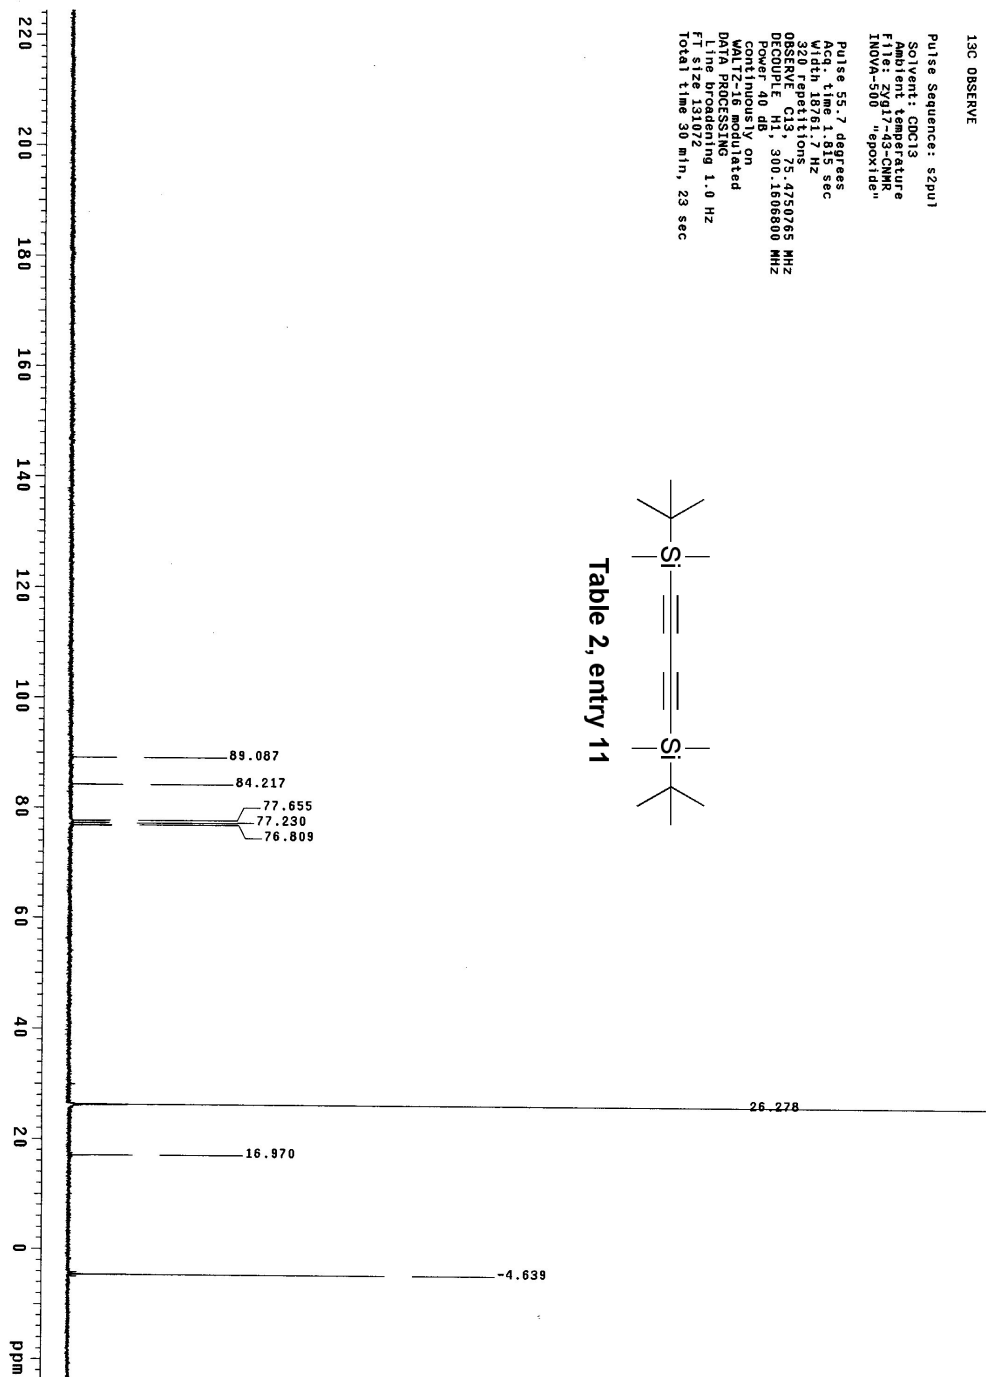

STANDARD 1H OBSERVE  
Pulse Sequence: s2pu1  
Solvent: CDCl3  
Ambient temperature  
File: zyg18-18-2-product-1HNMR  
INOVA-500 "epoxide"  
Relax. delay 1.000 sec  
Pulse 49.6 degrees  
Acq. time 1.995 sec  
F1 size 32788  
4 Repetitions  
OBSERVE HI, 300.1592196 MHz  
DATA PROCESSING  
F1 size 32788  
Total time 0 min, 12 sec

Table 2, entry 12

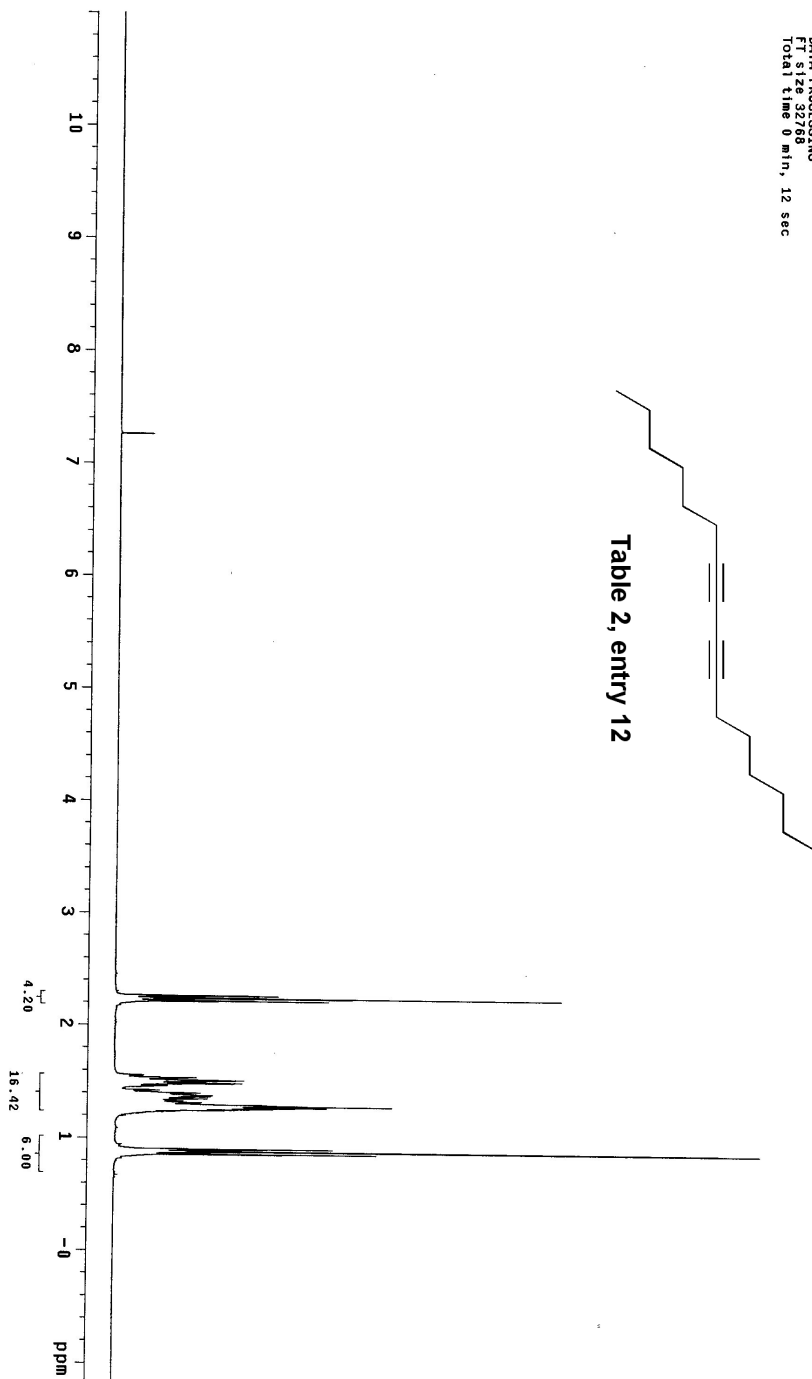

13C OBSERVE

Pulse Sequence: s2pu1  
Solvent: CDCl3  
Ambient temperature  
File: ZYG18-18-2-product-CMNR  
INOVA-500 epox1d8  
Pulse 55.7 degree  
Acq time 1.45 sec  
Width 18761.7 Hz  
240 repetitions  
OBSERVE C13, 75.4750785 MHz  
PULSE 40 Hs, 300.1606900 MHz  
Continuously on  
WALTZ-16 modulated  
DATA PROCESSING  
Line broadening 1.0 Hz  
Time 12.44102  
Total time 30 min, 23 sec

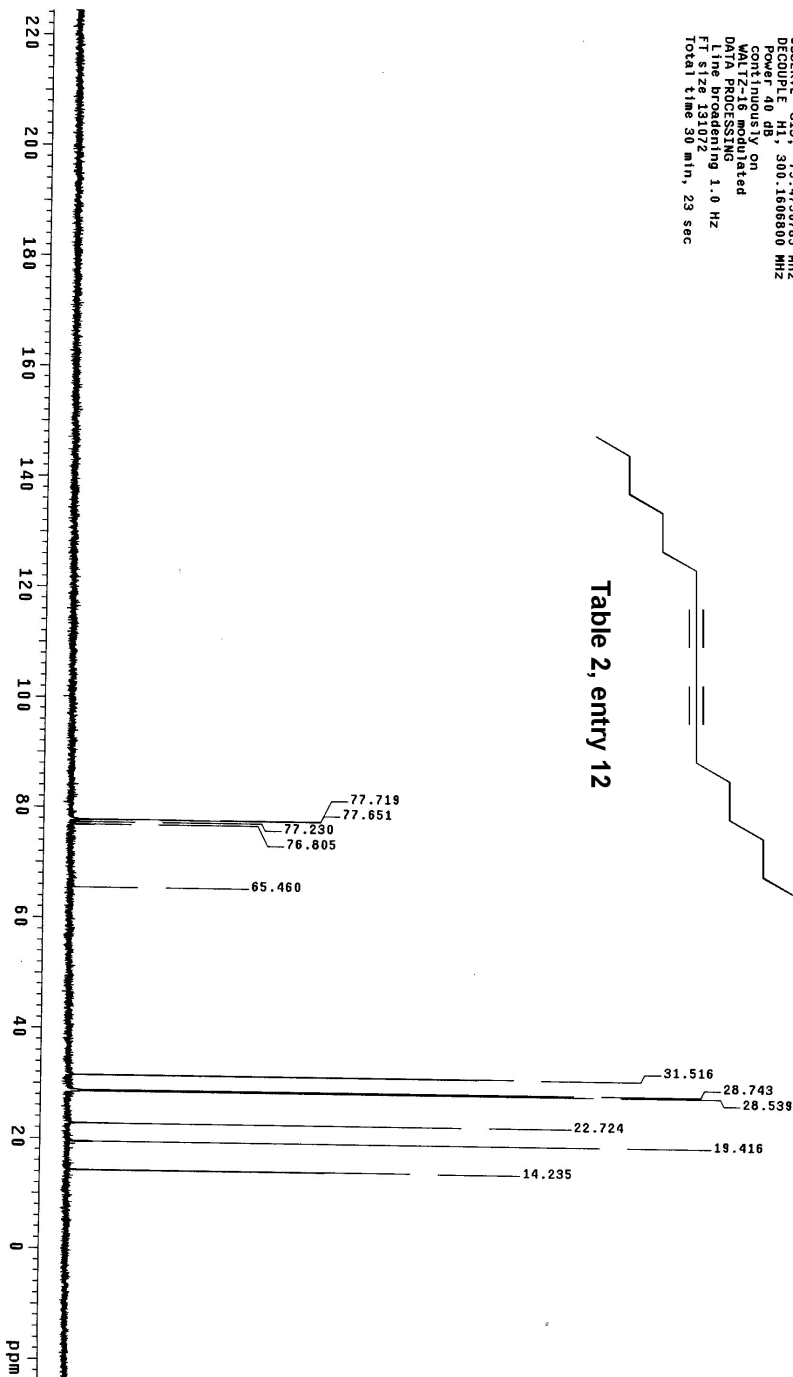





13C OBSERVE

Pulse Sequence: szpu1  
 Solvent: CDCl3  
 Ambient temperature  
 File: ZYG18-S2-CHMR  
 INOVA-500 epoxide  
 Pulse 55.7 degrees  
 Acquisition 4.13 sec  
 Width 18761.7 Hz  
 128 repetitions  
 OBSERVE C13, 75.4750777 MHz  
 DECOUPLE H1, 300.1606800 MHz  
 Continuously on  
 WALTZ-16 modulated  
 DATA PROCESSING  
 Line broadening 1.0 Hz  
 File size 131072  
 Total time 30 min, 23 sec

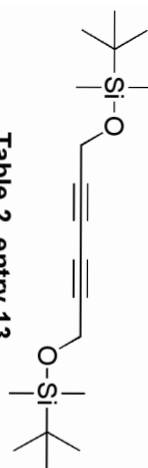

Table 2, entry 13

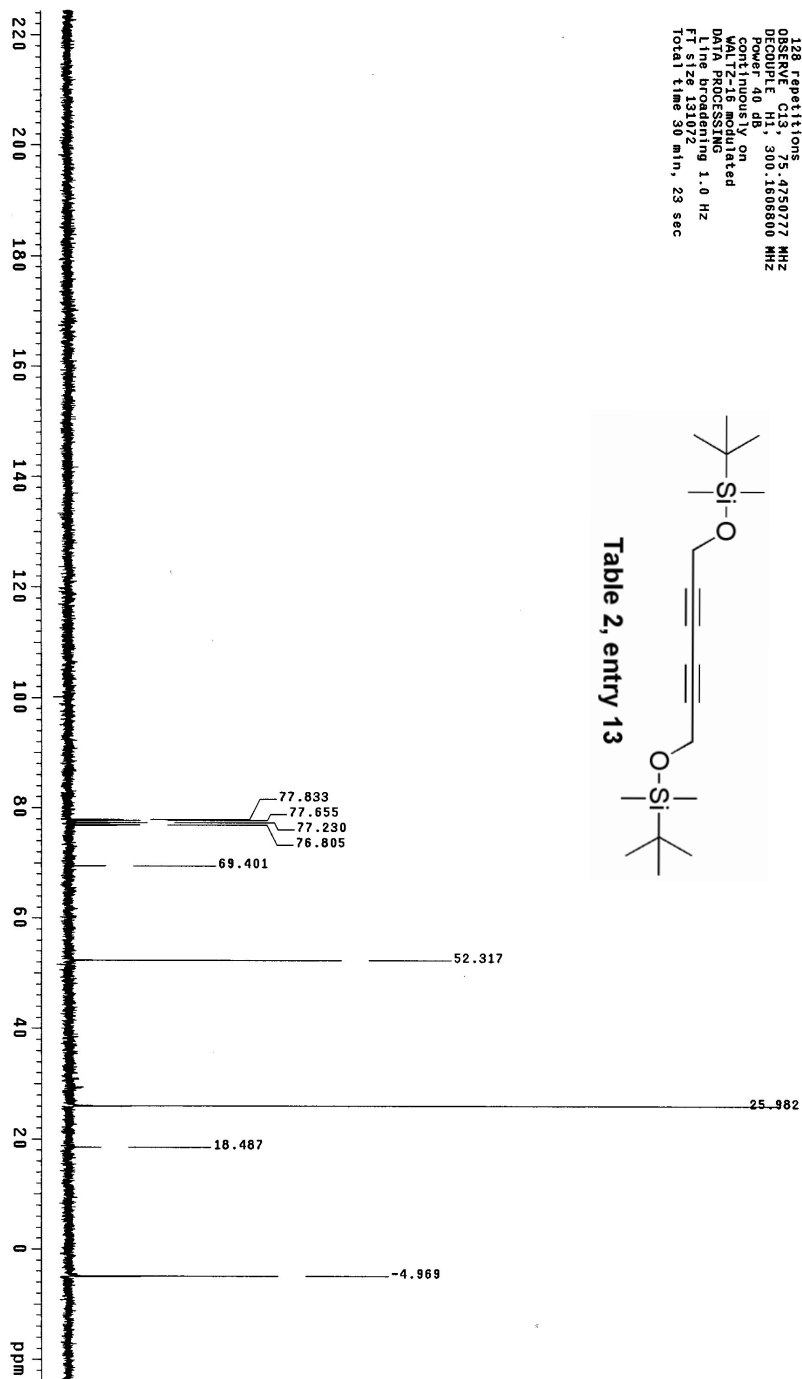

STANDARD 1H OBSERVE  
Pulse Sequence: s2pul1  
Solvent: CDCl3  
Ambient temperature  
F1: 500 MHz spectrometer  
INOVA-500 spectrometer  
Relax. delay: 1.000 sec  
Pulse: 49.6 degrees  
Acq. time: 1.998 sec  
Width: 4500.5 Hz  
# of repetitions: 300.1592196 MHz  
# of scans: 1  
DATA PROCESSING  
FT size: 92788  
Total time: 0 min, 12 sec

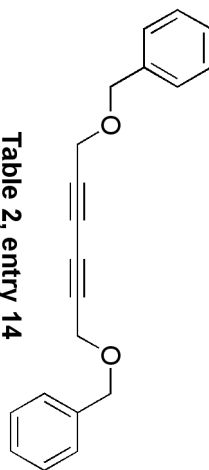

Table 2, entry 14

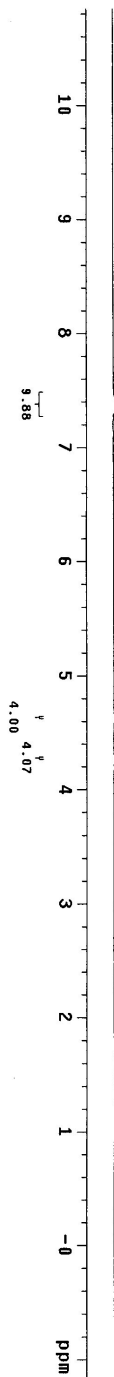

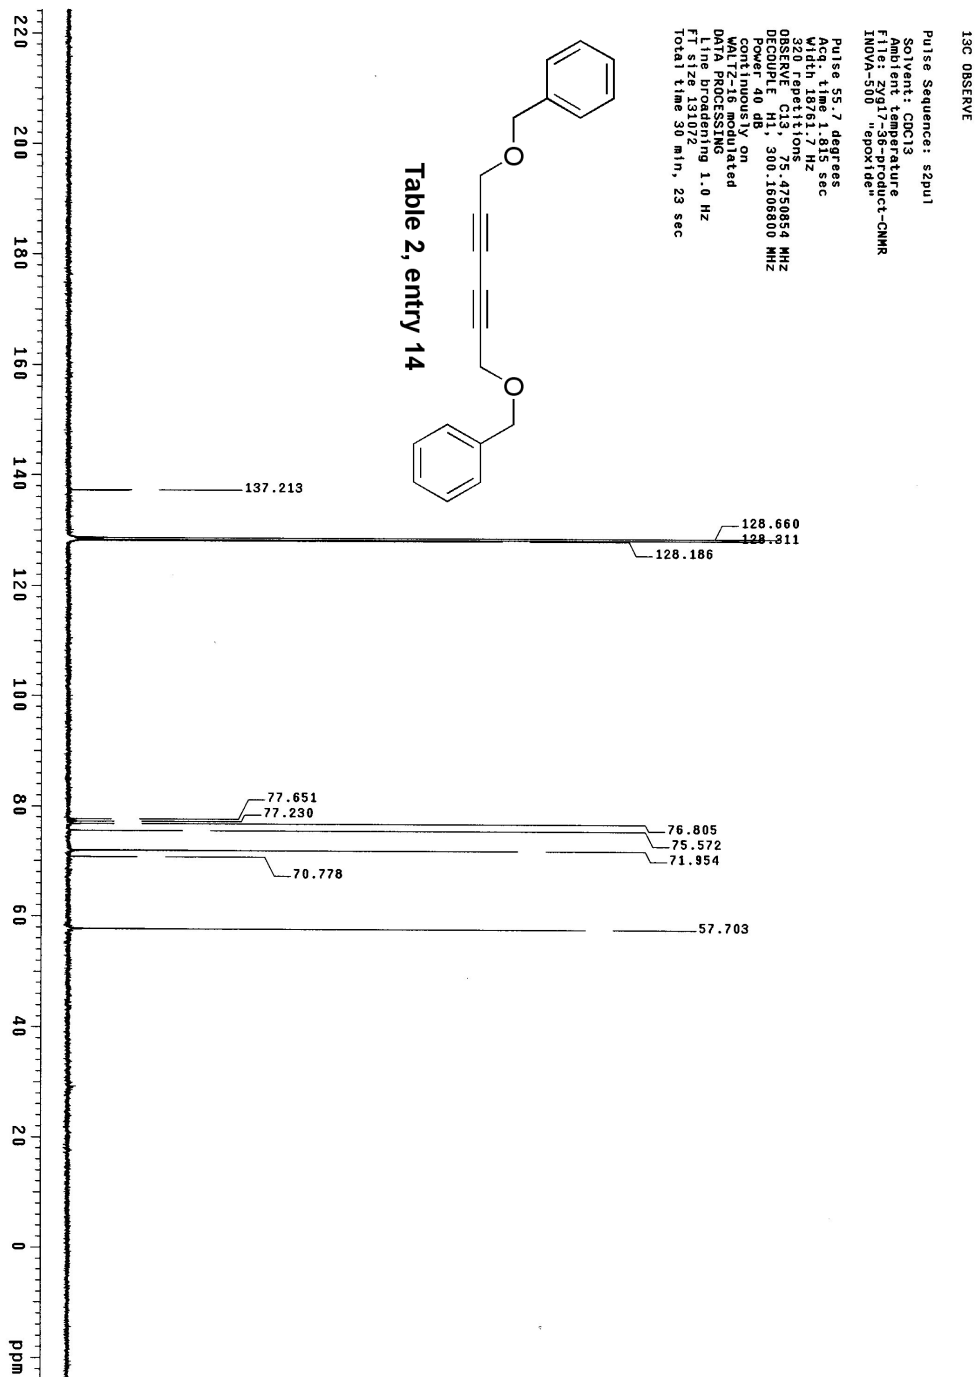

STANDARD 1H OBSERVE  
Pulse Sequence: s2pu1  
Solvent: CDCl3  
Ambient temperature  
File: ZYG18-21-Product-HMNR  
INOVA-500 "epox18"  
Pulse: d418v 1.000 sec  
Pulse: d43 4.000 sec  
Acq. time 1.936 sec  
Width 4500.5 Hz  
4 repetitions  
OBSERVE: q11,300.1592196 MHz  
PULSEPROG: zgpg30  
PR: 4  
SI: 32768  
Total time 0 min, 12 sec

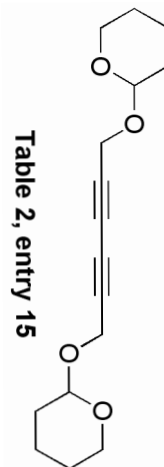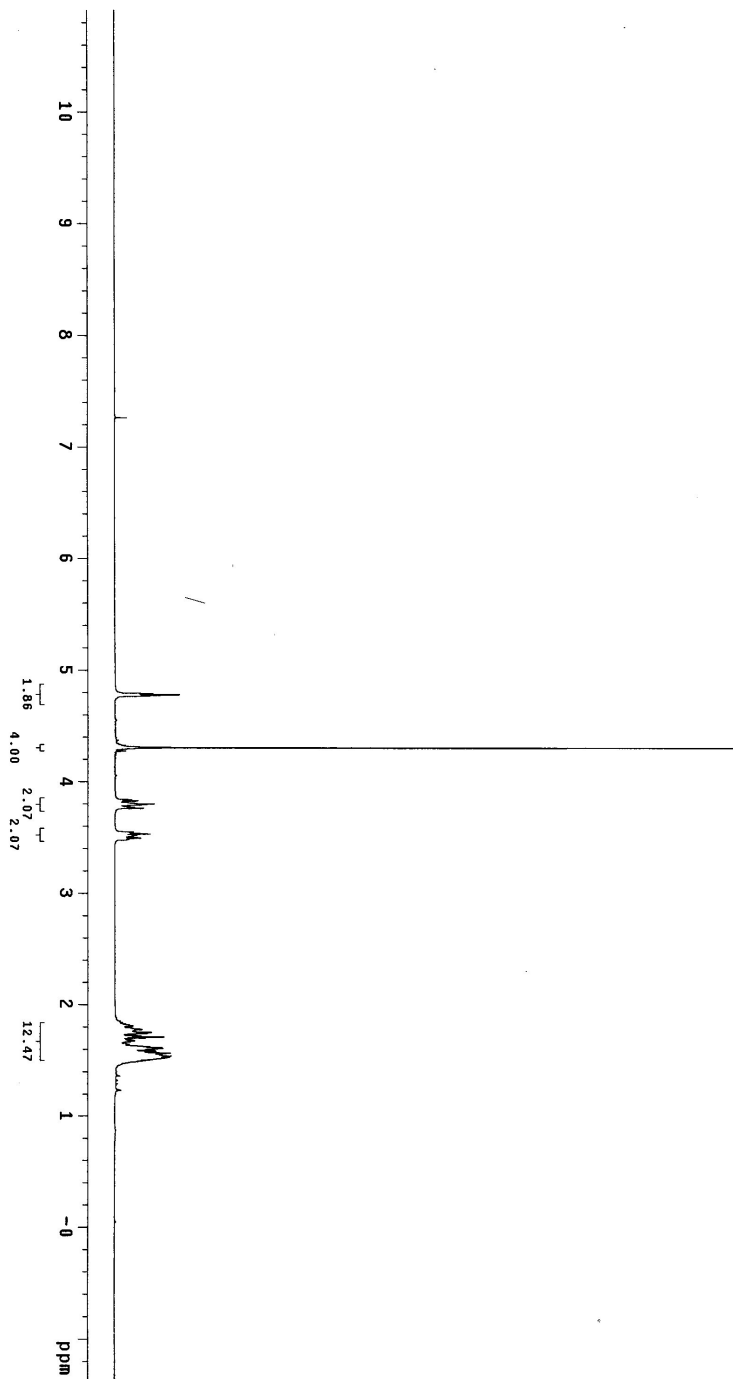

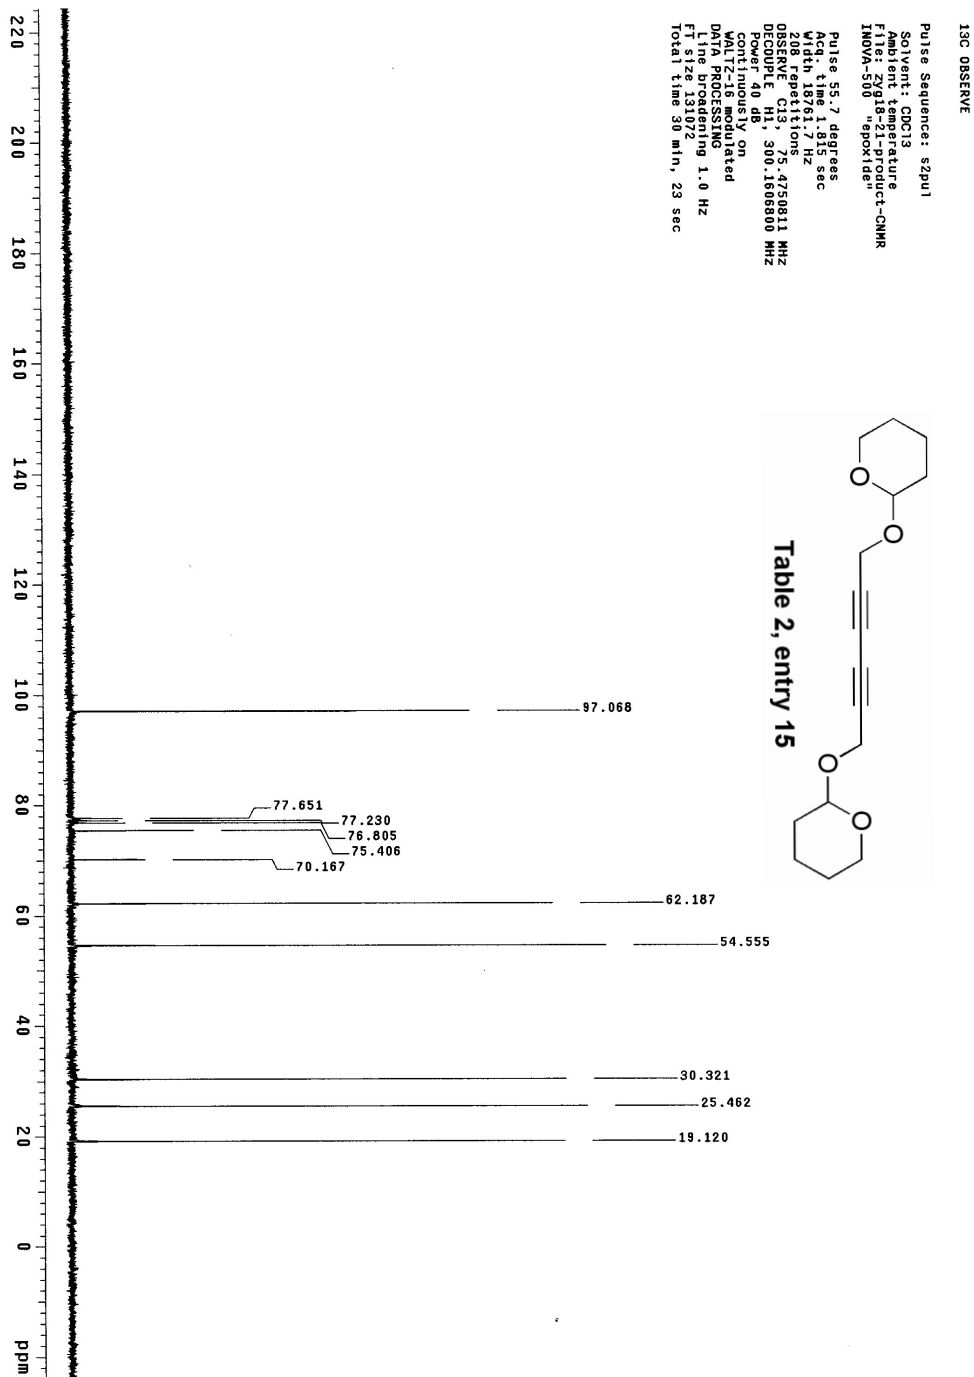

Supplement: c3ob41621f.pdf [file c3ob41621f.pdf]
